# 1 Mosaic and non-mosaic protocadherin 19 mutation leads 2 to neuronal hyperexcitability in zebrafish

3  
4 **Barbara K. Robens<sup>1,2</sup>, Xinzhu Yang<sup>1,2</sup>, Christopher M. McGraw<sup>1,2,3,4</sup>, Laura H.  
5 Turner<sup>1,2</sup>, Carsten Robens<sup>5</sup>, Summer Thyme<sup>6</sup>, Alexander Rotenberg<sup>1,3,7</sup>, Annapurna  
6 Poduri<sup>1,2,3,7</sup>**

7 <sup>1</sup>Department of Neurology, F.M. Kirby Neurobiology Center, Boston Children's Hospital – Harvard Medical  
8 School, Boston, MA, USA

9 <sup>2</sup>Epilepsy Genetics Program, Department of Neurology, Boston Children's Hospital – Harvard Medical  
10 School, Boston, MA, USA.

11 <sup>3</sup>Department of Neurology, Harvard Medical School, Boston, MA, USA

12 <sup>4</sup>Division of Epilepsy, Department of Neurology, Massachusetts General Hospital, Boston, MA, USA

13 <sup>5</sup>MIT-Harvard Center for Ultracold Atoms, Research Laboratory of Electronics, and Department of Physics,  
14 Massachusetts Institute of Technology, Cambridge, Massachusetts 02139, USA

15 <sup>6</sup>Department of Neurobiology, University of Alabama at Birmingham, Birmingham, AL, USA

16 <sup>7</sup>Division of Epilepsy and Clinical Neurophysiology, Department of Neurology, Boston Children's Hospital,  
17 Boston, MA, USA

18

19 Correspondence should be addressed to Annapurna.Poduri@childrens.harvard.edu

20 **Keywords:** PCDH19, girls clustering epilepsy, hyperexcitability, zebrafish, mosaicism, epilepsy, X-  
21 linked, anxiety, learning and memory, inhibitory neurons.

## 22 **Abstract**

23 Epilepsy is one of the most common neurological disorders. The X-linked gene *PCDH19* is  
24 associated with sporadic and familial epilepsy in humans, typically with early-onset clustering  
25 seizures and intellectual disability in females but not in so-called 'carrier' males, suggesting that  
26 mosaic *PCDH19* expression is required to produce epilepsy. To characterize the role of loss of  
27 *PCDH19* function in epilepsy, we generated zebrafish with truncating *pcdh19* variants. Evaluating  
28 zebrafish larvae for electrophysiological abnormalities, we observed hyperexcitability phenotypes  
29 in both mosaic and non-mosaic *pcdh19*<sup>+/-</sup> and *pcdh19*<sup>-/-</sup> mutant larvae. Thus, we demonstrate that  
30 the key feature of epilepsy—network hyperexcitability—can be modeled effectively in zebrafish,  
31 even though overt spontaneous seizure-like swim patterns were not observed. Further, zebrafish  
32 with non-mosaic *pcdh19* mutation displayed reduced numbers of inhibitory interneurons  
33 suggesting a potential cellular basis for the observed hyperexcitability. Our findings in both  
34 mosaic and non-mosaic *pcdh19* mutant zebrafish challenge the prevailing theory that mosaicism  
35 governs all *PCDH19*-related phenotypes and point to interneuron-mediated mechanisms  
36 underlying these phenotypes.

## 1 Introduction

2 Epilepsy is a common chronic disorder of the brain characterized by recurrent, unprovoked  
3 seizures with a substantial contribution from genetic causes. The X-linked gene *PCDH19*,  
4 encoding the cell-cell adhesion molecule protocadherin 19, has emerged as one of the most  
5 prominent single genes associated with epilepsy (Dibbens et al., 2008; Duszyc et al., 2015; Epi4K  
6 Consortium and Epilepsy Phenome/Genome Project, 2017). Pathogenic variants in *PCDH19* were  
7 shown to cause PCDH19-clustering epilepsy (CE), previously referred to as Epilepsy and Mental  
8 Retardation Limited to Females (EFMR), OMIM #300088). Disease manifestations vary in  
9 severity, even among individuals with the same variant. They include early-onset seizures that are  
10 often fever-related and cluster with multiple seizures occurring one after another, intellectual  
11 disability, and autism (Dibbens et al., 2008; Dimova et al., 2012; Smith et al., 2018). The disorder  
12 follows a unique inheritance pattern, affecting primarily heterozygous females and sparing  
13 hemizygous males, at least from overt epilepsy and severe symptomatology; rarely observed males  
14 who are mosaic for hemizygous variants in this gene also display these major symptoms (Kolc et  
15 al., 2018). It has been proposed that the tissue mosaicism caused by random X-inactivation in all  
16 female cells leads to an abnormal cellular pattern during development. The so-called ‘cellular  
17 interference’ hypothesis posits that the presence of a mixture of cells in the brain, expressing  
18 either wild-type or mutant PCDH19 protein, leads to abnormal brain development and is  
19 consequently the underlying cause of the clinical manifestations (Depienne et al., 2009).  
20 However, it is still unclear how mosaic expression of PCDH19 in the brain leads to epileptogenesis  
21 and whether mosaic expression of wild-type (WT) and mutant protein in neurons is the sole cause  
22 for the clinical manifestations of PCDH19-CE.

23 The *PCDH19* gene consists of 6 exons, and most of the over 100 identified patient variants occur  
24 in exon 1, which encodes the 6 extracellular cadherin domains (Figure 1) (Kolc et al., 2018).  
25 PCDH19 is highly expressed in the brain and belongs to the largest subgroup of cadherins that are  
26 involved in calcium-dependent cell-cell adhesion (Depienne and LeGuern, 2012). However, the  
27 exact function of PCDH19 is still largely unknown. Recent studies in mice suggest that PCDH19  
28 determines cell adhesion affinities and is involved in cell sorting during cortical development and  
29 mossy fiber synapse development (Hoshina et al., 2021; Pederick et al., 2018). Even though  
30 *Pcdh19* heterozygous mice do not show gross behavioral abnormalities or spontaneous seizures,  
31 treatment with the  $\gamma$ -aminobutyric acid type A (GABA-A) receptor inhibitor flurothyl revealed  
32 increased seizure susceptibility; interestingly, this finding does not require tissue mosaicism as it  
33 is present in both female heterozygous and homozygous mice (Hayashi et al., 2017; Pederick et  
34 al., 2016; Pederick et al., 2018; Rakotomamonjy et al., 2020). Other *in vitro* studies suggest a role  
35 for *Pcdh19* in establishing proper brain architecture and neuronal connections (Mincheva-  
36 Tasheva et al., 2021; Pederick et al., 2016). Similar roles have been proposed for the highly  
37 conserved zebrafish (*Danio rerio*) *Pcdh19* protein which was shown to be involved in cell  
38 proliferation and neuronal organization of the optic tectum, the largest region of the zebrafish  
39 brain, important for visual processing (Cooper et al., 2015).

40 To better understand the role of *PCDH19* in the developing brain and the impact cellular *Pcdh19*  
41 mosaicism has in neurodevelopmental epilepsy, we developed mosaic and non-mosaic models of  
42 PCDH19 disorder in zebrafish by CRISPR/Cas9-mediated gene editing. Importantly, the mosaic  
43 mutants are comprised of some cells expressing mutant *pcdh19* and some wildtype, most closely

1 approximating the mosaic expression that occurs in heterozygous female patients with PCDH19-  
 2 CE. Because *pcdh19* is not present on a sex chromosome in zebrafish, we had the opportunity to  
 3 also create mutants with germline heterozygous and homozygous frameshift mutations, predicted  
 4 to lead to premature truncation and consequent loss of one or both copies of *pcdh19*. This provides  
 5 the unique opportunity to evaluate the effects of mosaic and non-mosaic *pcdh19* variants in the  
 6 zebrafish system, which is well-suited to evaluate features of epilepsy and neurodevelopmental  
 7 dysfunction (Griffin et al., 2017). Given the human disease presentation of PCDH19-CE with  
 8 seizures (spontaneous and fever-induced), learning defects, and other neuropsychiatric features,  
 9 we assayed our models for zebrafish correlates of these features. We also performed  
 10 neuroanatomic analyses to understand the mechanisms by which both mosaic and non-mosaic  
 11 *Pcdh19* loss-of-function (LOF) may lead to phenotypes in larval zebrafish.

## 12 Results

### 13 Generation of *pcdh19* zebrafish mutants.

14 We generated zebrafish mutant lines with frameshift mutations that result in premature stop  
 15 codons in exon 1 of the *pcdh19* gene (Figure 1A). We studied stable heterozygous (*pcdh19*<sup>+/-</sup>) and  
 16 homozygous (*pcdh19*<sup>-/-</sup>) knockout (KO) zebrafish lines as well as mosaic F<sub>0</sub> larvae that were  
 17 acutely injected with the same guide RNA targeting exon 1 of *pcdh19*, which results in mosaic

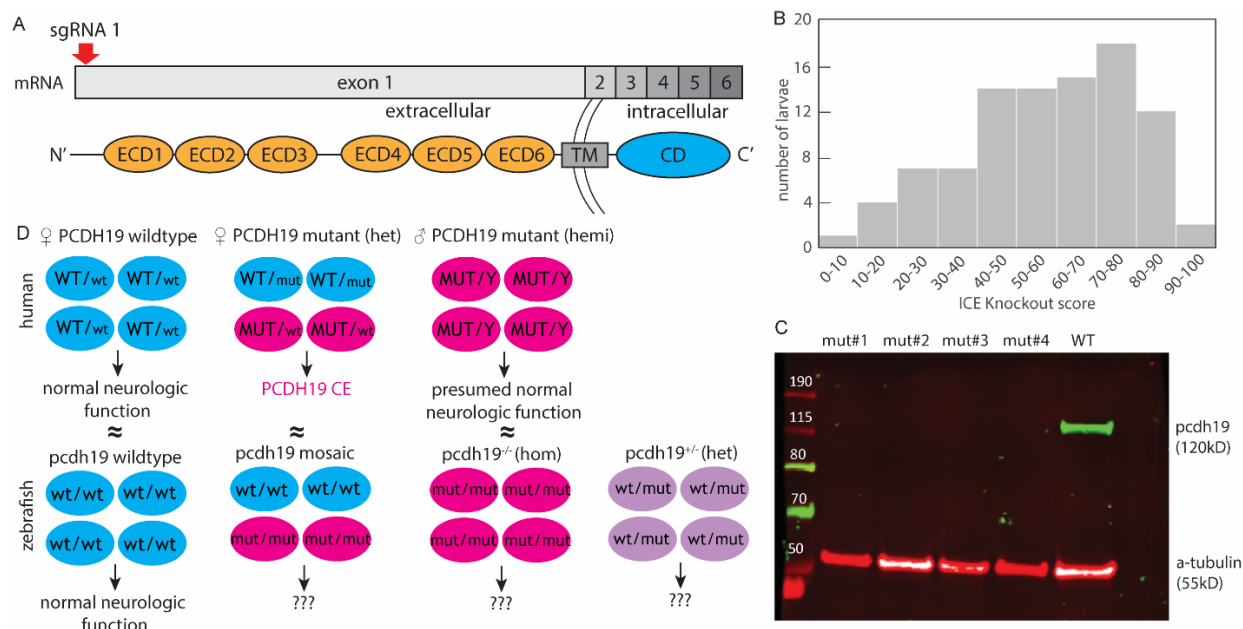

18  
 19 **Figure 1:** Mutant *pcdh19* loss-of-function zebrafish model. (A) Mutations introducing a 44-nucleotide insertion and 1-  
 20 nucleotide deletion were introduced in the *pcdh19* gene at exon 1 (coding for the extracellular cadherin domains, ECD)  
 21 (TM, transmembrane domain; CD, C-terminal domain), resulting in a frameshift. (B) Histogram of 192 Fo larvae  
 22 injected with *pcdh19* sgRNA illustrating the distribution of the KO score, representing the proportion of cells predicted  
 23 to result in the knockout due to the presence of a frameshift. (C) Western blot showing loss of full-length *Pcdh19* protein  
 24 in four different generated *pcdh19*<sup>-/-</sup> mutant lines while WT larvae have intact *Pcdh19* protein expression. (D) Schematic  
 25 to illustrate the proposed disease mechanism in male and female humans and how we approached modeling them in  
 26 zebrafish (wt, wildtype; mut, mutant).

27

1 expression of *Pcdh19* across all *Pcdh19*-expressing cells. Presence of the mosaic mutation was  
2 verified by DNA sequencing from *pcdh19* sgRNA-injected F<sub>0</sub> larvae (after the experiments  
3 described below), and a 'knockout score' (reflecting the percentage of cells bearing the variant)  
4 was estimated by Interference of CRISPR Edits (ICE) analysis (Figure 1B). We observed highly  
5 variable numbers of indels generated by the CRISPR/Cas9 approach, which we leveraged in this  
6 study to mimic the tissue mosaicism present in females with *PCDH19* variants caused by random  
7 X-inactivation events during fetal development. Mosaic mutants with KO scores of >40 were used  
8 for subsequent experiments. We excluded the possibility that maternal wildtype mRNA is present  
9 early in development, either at the stage when we are evaluating larvae for phenotypes or before  
10 and exerting a lingering effect in our mosaicism model: we extracted mRNA from unfertilized eggs  
11 as well as embryos at 2hpf, 4hpf, and 24hpf and assessed the amount of *pcdh19* mRNA through  
12 quantitative PCR (qPCR). The levels of *pcdh19* mRNA were undetectable in the unfertilized eggs  
13 and in the 2hpf and 4hpf embryos (Suppl.Fig. 1), indicating that negligible or no amount of  
14 maternal *pcdh19* mRNA is, likely to play a role in influencing the phenotypes we are evaluating  
15 during development. Successful loss of full-length *Pcdh19* protein in different knockout mutants  
16 was verified by Western blot (Figure 1C). These different *Pcdh19* LOF models reflect the human  
17 condition and give us the unique opportunity to study the effects of mosaic and non-mosaic  
18 *Pcdh19* disruption (Figure 1D). None of our generated *pcdh19* mutant fish lines showed gross  
19 morphological abnormalities. Head and body size and shape were normal, general mobility,  
20 fertility, and survival (to at least 2 years) were intact.

21

## 22 **Increased spontaneous firing activity in zebrafish larvae with *pcdh19* mutations.**

23 To determine whether mosaic or non-mosaic *pcdh19* mutations result in abnormal neuronal  
24 network activity, we measured local field potentials (LFPs) in the optic tectum of 6-7dpf zebrafish  
25 larvae (Figure 2), a brain region known to have abnormal neuronal organization in the setting of  
26 *Pcdh19* dysfunction (Cooper et al., 2015). In general, we distinguished between two types of  
27 spiking events that occurred in all our recordings at varying frequencies: events with a narrow  
28 peak and small amplitude (SAE) and events with a broad peak and large amplitude (LAE) (Figure  
29 2A). LFP traces of wildtype larvae only occasionally captured the high-voltage events (approx.  
30 0.2-0.4mV), while KO mutants displayed a range of epileptiform abnormalities. We often  
31 observed medium- to high- voltage deflections clustered in bursts and sometimes also in isolation.  
32 Discrete epileptiform discharges were 150-500ms long and resulted in 0.2-0.3mV sharp or blunt  
33 deflections. Quantification revealed a significantly increased LAE spike rate in mosaic and non-  
34 mosaic mutant *pcdh19* lines compared to their respective controls, while the three different  
35 control groups showed a uniformly low LAE spike rate (Figure 2B). LAE amplitude was  
36 significantly increased only in non-mosaic *pcdh19*<sup>+/-</sup> KO larvae (Figure 2C). Quantification of  
37 burst frequency revealed abnormal clustering of large spiking events in the mosaic and non-  
38 mosaic *pcdh19*<sup>+/-</sup> mutants compared to control larvae (Figure 2D). Similar but less frequent  
39 epileptiform abnormalities were observed in homozygous *pcdh19*<sup>-/-</sup> KO zebrafish larvae. We  
40 confirmed these abnormal electrographic patterns in the form of increased and clustered bursts  
41 of abnormal neuronal firing in heterozygous and homozygous KO larvae in an independent  
42 *pcdh19* KO line with a frameshift mutation introduced at exon 2 (Suppl.Fig2A-D). These results  
43 indicate that a disruption of *Pcdh19* function results in increased neuronal activity in *pcdh19*  
44 mutant fish, independent of mosaicism. Taken together, we found epileptiform activity in the

1 form an increased neuronal spike rate in the tectum of mosaic and KO larvae that is clustered in  
2 bursts in mosaic and heterozygous KO larvae.

3

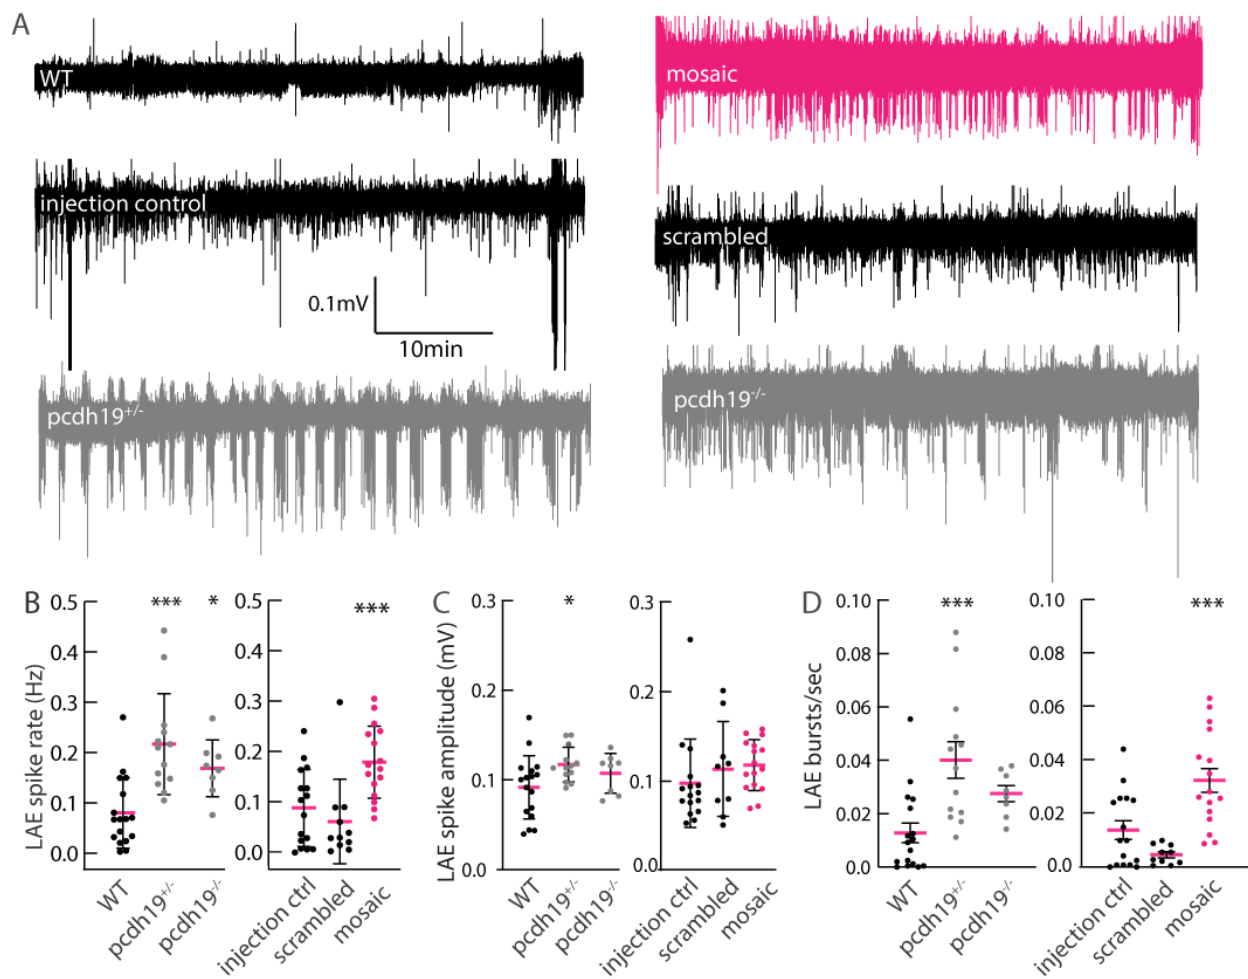

4

5 **Figure 2:** Hyperexcitability in LFP recordings of *pcdh19* mutant larval tectum. (A) Exemplary traces of LFP recordings  
6 for control and *pcdh19* mutants showing large amplitude events (LAE) consisting of bursts of spikes present in *pcdh19*  
7 mutants, which are rare in controls. (B) Quantification shows an increase in LAE rate in all *pcdh19* mutant lines,  
8 compared to their respective controls; mosaics were compared to scrambled injected and a 'control injected' group  
9 representing larvae that were injected with *pcdh19* sgRNA but had <10% indel frequencies. (C) The average LAE spike  
10 amplitude is increased in *pcdh19*<sup>+/-</sup> KO mutant lines compared to WT controls. (D) The average amount of bursts is  
11 increased in *pcdh19*<sup>+/-</sup> KO and mosaic mutants compared to their respective controls. n=16 WT, n=13 *pcdh19*<sup>+/-</sup>, n=8  
12 *pcdh19*<sup>-/-</sup>, n=16 mosaic, n=15 injection control, n=11 scrambled injected. One-way ANOVA with Dunnett's multiple  
13 comparisons test, \*p<0.05, \*\*p<0.01, \*\*\*p<0.001.

14

15 In complementary experiments, we further tested for hyperexcitability as a result of *pcdh19*  
16 dysfunction. First, we used the genetically encoded calcium sensor GCaMP6s to assess whole  
17 brain activity using lightsheet microscopy (Turrini et al., 2017). Cytosolic GCaMP6s is expressed  
18 pan-neuronally (elav3 promoter) and visualizes calcium influx during neuronal activity as  
19 changes in fluorescence (Figure 3A). We observed abnormal network activity in the tectum of a  
20 *Pcdh19*<sup>+/-</sup> KO mutant, showing distinct clusters of neurons in the tectum with short bursts of

1 increased activity (Figure 3B). We also observed longer-duration periods of dramatically  
2 increased whole brain activity (Figure 3C,D) lasting 1 to 2 min (Suppl. Video 1). Second, we used  
3 the neuronal activity marker phospho-ERK (pERK) to visualize and identify brain areas with  
4 increased neuronal activity 10 min prior to examination (Thyme et al., 2019). Whole brain  
5 antibody staining against pERK relative to total ERK (tERK) revealed increased pERK  
6 fluorescence signals within different parts of the tectum mainly in mosaic mutants and to a lesser  
7 extend in *pcdh19*<sup>-/-</sup> mutants relative to control animals. While mosaic mutants primarily showed  
8 an increase in pERK signal in the neuropil, where neuronal processes converge, homozygous  
9 mutants had a decrease in parts of the medial tectum (Figure 3E); and heterozygous mutants  
10 showed no difference vs. controls. To corroborate that the increased brain activity in mosaic fish  
11 can be attributed to Pcdh19 dysfunction, we generated mosaic *pcdh19* mutants using a different  
12 sgRNA targeting *pcdh19* at exon 2. We observed a similar pattern of increased pERK signal in the  
13 tecum of these larvae (Supp2.Fig1E). These experiments indicate that abnormal brain activity  
14 might be limited to the optic tectum in larval zebrafish. Together, these results provide further  
15 evidence that Pcdh19 dysfunction results in altered brain activity. However, using pERK as a  
16 marker for neuronal activity only showed a significant increase in the tectum of mosaic mutants.  
17

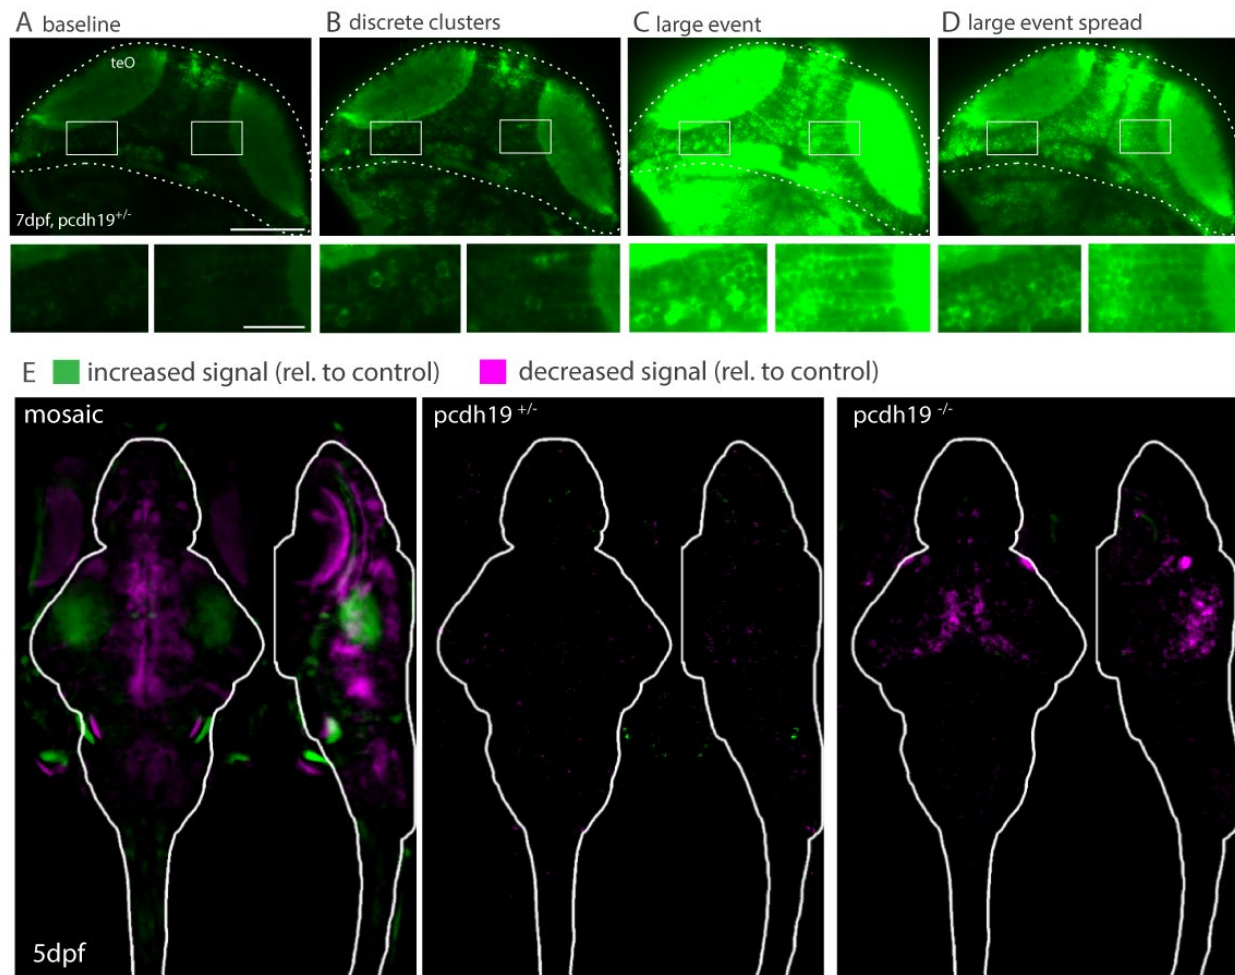

18  
19 **Figure 3:** Hyperexcitability in *pcdh19* mutants. (A) Lightsheet images of a GCaMP6s-expressing *pcdh19*<sup>+/-</sup> mutant fish  
20 at baseline. Scale bar 100µm and 20µm in higher magnification images below. teO; tectum opticum. (B) Increased  
21 GCaMP fluorescence in two different neuronal clusters of the tectum. (C) Dramatic increase in GCaMP fluorescence

1 across the entire brain of a *pcdh19*<sup>+/-</sup> mutant fish during a large discharge event. (D) Slowly attenuating GCaMP  
2 intensity after the large event. (E) Sum of slices projection of confocal images show pERK signal intensity is increased  
3 in retinotectal processes in mosaic *pcdh19* mutant larvae, no change in *pcdh19*<sup>+/-</sup> mutants, and decreased signal in  
4 *pcdh19*<sup>-/-</sup> mutants, n=18 mosaic, n=28 scrambled injected, n=82 *pcdh19*<sup>+/-</sup> and n=28 *pcdh19*<sup>-/-</sup> larvae.

## 6 **Mosaic and non-mosaic mutations in *pcdh19* do not lead to a consistent seizure** 7 **phenotype.**

8 To assess whether the abnormal patterns of electrical activity observed in the LFP recordings and  
9 in calcium imaging correlate with seizure-like activity, we subjected mutant and control larvae to  
10 high-throughput assays to further characterize the range of abnormalities resulting from *Pcdh19*  
11 dysfunction. We evaluated for behavioral seizure-like events in zebrafish larvae, defined as short  
12 episodes of hyperlocomotion that result in rapid swimming (Baraban et al., 2013) that can either  
13 occur spontaneously or can be evoked by proconvulsant compounds or temperature elevation  
14 (hereafter referred to as seizures). At baseline, we observed only occasional seizures in WTs  
15 (2.5%), which was comparable to the *pcdh19*<sup>+/-</sup> (2%), *pcdh19*<sup>-/-</sup> (0.7%), and mosaic (0.3%) groups  
16 (Figure 4A). When challenged with a concentration of PTZ (0.1 mM) that is not sufficient to  
17 generate seizures in WT larvae (a ‘subthreshold’ concentration), a significantly higher proportion  
18 of *pcdh19*<sup>+/-</sup> mutant larvae exhibited seizures than WT larvae (4.2% vs 0.9% WT) (Figure 4A).  
19 Seizing *pcdh19*<sup>+/-</sup> mutants also had more seizures over the duration of the trial than the WT larvae  
20 (Figure 4A). Slowly increasing the bath temperature, and consequently larval body temperature,  
21 from 22°C to 37°C resulted in a few seizures in WT larvae (<2%) and no significant changes from  
22 the baseline seizure frequency in the *pcdh19* mutant groups: *pcdh19*<sup>+/-</sup> (3.1%), *pcdh19*<sup>-/-</sup> (1.2%),  
23 mosaic *pcdh19* mutants (4.6%) (Figure 4A). Increasing the PTZ concentration to 2.5 mM, a  
24 concentration at which most animals are expected to develop seizures, significantly more  
25 *pcdh19*<sup>+/-</sup> KO larvae (99.5%) had at least one seizure compared to WT larvae (90.8%) (Figure 4B).  
26 The average number of seizures in each group was similar (13.1% seizures/WT vs 13.7%  
27 seizures/*pcdh19*<sup>+/-</sup> larvae) (Figure 4B). In some forms of epilepsy, seizures can be triggered by  
28 intermittent photic stimulation; we therefore challenged mutant larvae with exposure to different  
29 light-dark paradigms and strobed frequencies. Although the *pcdh19*<sup>+/-</sup> and *pcdh19*<sup>-/-</sup> KO mutants  
30 moved on average more and with higher velocities during dark periods, we did not detect striking  
31 differences or seizures in response to different strobe light frequencies between groups (Figure  
32 4D). To summarize, only the non-mosaic heterozygous *pcdh19* KO mutants showed a slightly  
33 increased susceptibility to chemically provoked seizures while the mosaic and non-mosaic *pcdh19*<sup>-/-</sup>  
34 KO mutant larvae did not have an increase in seizure events compared to their controls in any  
35 of the tested assays. We did not observe a correlation between the electrographic abnormalities  
36 observed during LFP recordings in the mosaic and KO mutant lines and the occurrence of gross  
37 behavioral seizures.

38 Since our behavioral seizure detection and analysis might not be sensitive enough as a readout to  
39 capture the hyperexcitability phenotype of *pcdh19* mutants, we performed low-resolution, high-  
40 throughput calcium imaging to assess for and characterize seizure-like activity. We observed  
41 *pcdh19*<sup>+/-</sup> and *pcdh19*<sup>-/-</sup> KO larvae with stereotypical rapid, swirling swim behaviors and a  
42 simultaneous increase in GFP fluorescence, likely representing seizures with increased brain  
43 activity that subsided after the events (Suppl. Video 2, 3). However, quantification with our event  
44 detection algorithm did not capture a difference in the overall rate of high calcium events between  
45 untreated *pcdh19* KO mutants and WT or scrambled injected vs mosaic animals (Figure 4C).

1 Interestingly, PTZ treatment provoked on average slightly more calcium events in mosaic *pcdh19*  
 2 mutants compared to scrambled injected controls (Figure 4C). However, again we did not observe  
 3 a clear correlation between the neuronal hyperexcitability that occurs in mosaic and KO mutants  
 4 and an increase in high calcium spiking events in this experimental setting since there was no  
 5 consistent increase in neuronal calcium activity in mosaic and KO mutant *pcdh19* larvae  
 6 compared to control larvae. These results suggest that low-resolution microscopy is not suited to

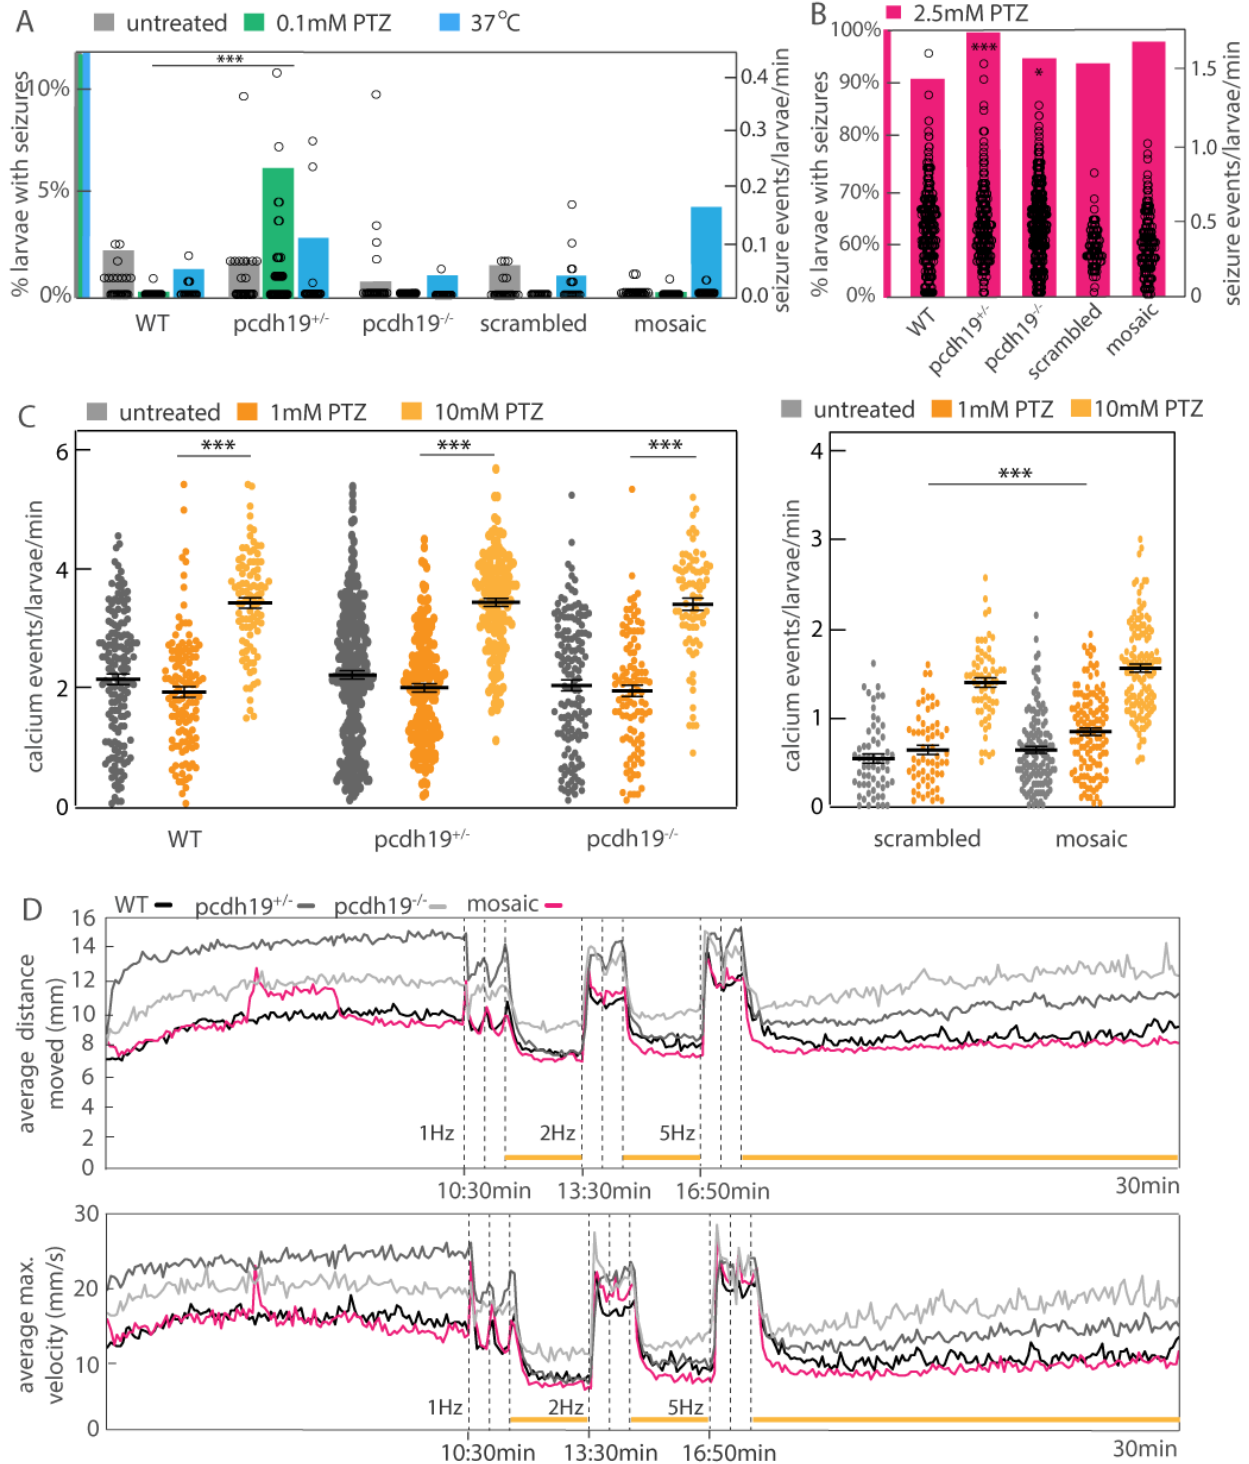

7



1 **Figure 4:** High-throughput detection of spontaneous and provoked seizure activity by behavioral and calcium  
2 fluorescence-based assays. (A) Quantification of the percentage of larvae with seizure events (left axis, green  
3 bar=0.1mM PTZ exposure blue bar=exposure to 37°C warm water) and the number of seizures per larvae per minute  
4 (right axis, open circles) untreated (grey bars) or after exposure to 0.1mM PTZ (green bars) or temperature increase up  
5 to 37°C (blue bars). *pcdh19*<sup>+/-</sup> larvae treated with 0.1mM PTZ showed an increased number of seizures compared WT.  
6 Untreated and 0.1mM PTZ: n=429 WT, n=500 *pcdh19*<sup>+/-</sup>, n=539 *pcdh19*<sup>-/-</sup>, n=384 mosaic, n=192 scrambled, Chi-  
7 squared test, \*\*\*p<0.001. Untreated and temperature elevation: n=258 WT, n=96 *pcdh19*<sup>+/-</sup>, n=163 *pcdh19*<sup>-/-</sup>, n=150  
8 mosaic, n=192 scrambled, Chi- squared test, \*p<0.05, \*\*\*p<0.001. (B) Quantification of seizure events in larvae treated  
9 with 2.5mM PTZ (left axis, pink bars=2.5mM PTZ) induces seizures in almost all *pcdh19*<sup>+/-</sup> and *pcdh19*<sup>-/-</sup> mutant larvae,  
10 significantly more than in WT larvae. n=447 WT, n=225 *pcdh19*<sup>+/-</sup>, n=620 *pcdh19*<sup>-/-</sup>, n=192 mosaic, n=192 scrambled,  
11 Chi- squared test, \*p<0.05, \*\*\*p<0.001. The frequency of seizures in each animal is similar across genotypes (right  
12 axis, open circles) (C) Quantification of the average event rate of calcium transients in GCaMP6s larvae shows no  
13 difference between WT and mutants in the untreated condition; there is a significant increase in events in all groups  
14 after exposure to 10mM PTZ, similar to WT. Comparing mosaic and scrambled injected larvae shows a significant  
15 increase in calcium events when treated with 1mM PTZ. n=155 WT, n=264 *pcdh19*<sup>+/-</sup>, n=145 *pcdh19*<sup>-/-</sup>, n=128 mosaic,  
16 n=61 scrambled, one-way ANOVA with Tukey's multiple comparisons test for *Pcdh19* KO mutants and two-way  
17 ANOVA with Sidak's multiple comparisons test mosaic vs scrambled and PTZ vs no treatment, \*p<0.05, \*\*\*p<0.001.  
18 (D) Average movement (distance moved in top panel and maximum velocity in lower panel) of larvae exposed to dark,  
19 100% light (indicated by horizontal yellow lines), or 3 pulses, 3 sec each, of strobe light (1Hz, 2Hz, and 5Hz, indicated  
20 by vertical dashed lines) over 30 min did not change in response to the different light paradigms in *pcdh19* mutants  
21 compared to WT. n=223 WT, n=227 *pcdh19*<sup>+/-</sup>, n=134 *pcdh19*<sup>-/-</sup>, n=261 mosaic.

22  
23 to visualize changes in neuronal firing patterns that occur in all *pcdh19*<sup>+/-</sup> mutant lines, given the  
24 low number of synchronously firing neurons within a small brain area, as suggested in Figure 3B.

#### 25 26 **Fewer inhibitory neurons in the tectum of *pcdh19*<sup>+/-</sup> mutant larvae.**

27 To probe for a structural defect that might explain the abnormal neuronal excitability in *pcdh19*  
28 mutant larvae in the transgenic background Tg(*dlx6a*-1.4k*bdlx5a*/*dlx6a*:GFP::vGlu<sub>t</sub>:DsRed), we  
29 aimed to determine the number of inhibitory and excitatory neurons present in mutants vs. WT  
30 conditions. At 5dpf, WT transgenic larvae express GFP in distinct neuronal populations clustering  
31 in the tectum, forebrain, and midbrain, while dsRed expression is found in all brain areas with  
32 large clusters within the olfactory globes, midbrain, and parts of the hind brain (Figure 5A).  
33 Across the whole brain, no gross differences in the expression patterns and distribution of  
34 excitatory and inhibitory neurons were observed across all *pcdh19* mutant larvae. However,  
35 regional quantification revealed a difference in the number of inhibitory neurons within the  
36 tectum (Figure 5B). On average, fewer inhibitory neurons were present in the tectum of 5dpf  
37 *pcdh19*<sup>+/-</sup> KO zebrafish larvae compared to age-matched control larvae or *pcdh19*<sup>-/-</sup> KO mutants.  
38 Comparison of scrambled injected vs. mosaic *pcdh19* mutant larvae showed no difference in the  
39 number of inhibitory neurons in the tectum, suggesting that only the non-mosaic *pcdh19*<sup>+/-</sup> KO  
40 fish display this interneuron phenotype, correlating with the observation that these mutants also  
41 have the most pronounced behavioral hyperexcitability phenotype (as seen in Fig.4).

42

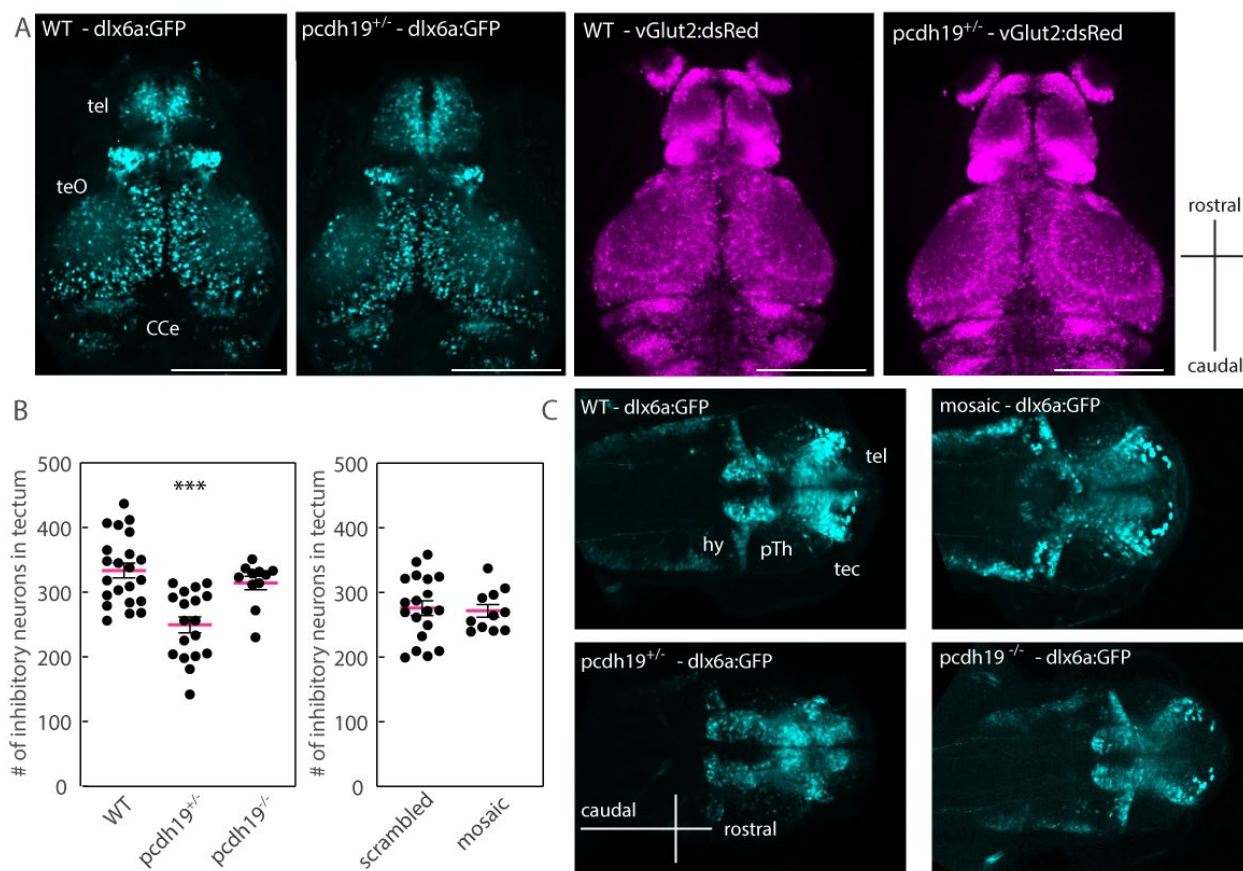

1  
2 **Figure 5:** Brain structural abnormalities in *pcdh19*<sup>+/-</sup> larvae. (A) Representative confocal maximum intensity  
3 projections of a Z-stack taken from a 5dpf WT and a *pcdh19*<sup>+/-</sup> mutant crossed with the Tg(dlx6a-  
4 1.4kbdlx5a/dlx6a:GFP::vglut2:DsRed) line show no gross morphological abnormalities in either the dsRed or the GFP  
5 expressing neuron population. Scale bar 200µm. (B) Quantification of the number of inhibitory neurons within the  
6 tectum shows a reduction only in *pcdh19*<sup>+/-</sup> mutants compared to WT controls. n=22 WT, n=19 *pcdh19*<sup>+/-</sup>, n=11 *pcdh19*<sup>-/-</sup>,  
7 n=19 mosaic, n=11 scrambled larvae, one-way ANOVA with Dunnett's multiple comparisons test, p<0.0001. (C)  
8 Representative confocal maximum intensity projections of a Z-stack of 2dpf WT, *pcdh19*<sup>+/-</sup>, *pcdh19*<sup>-/-</sup> and mosaic  
9 mutants showing an altered, immature neuronal pattern in the *pcdh19*<sup>+/-</sup> mutant compared to the WT larvae. tel,  
10 telencephalon; teO, tectum opticum; CCe, cerebellar corpus; tec, tectum; pTh, pre-thalamus, hy, hypothalamus.

11 To determine whether the reduced total number of inhibitory neurons, noted at 5dpf, in these  
12 mutants is due to increased cell death, we performed TUNEL assays at 2, 3, 4, and 5dpf in *pcdh19*  
13 KO mutants. Quantification did not show increased cell death in any of the lines at any  
14 investigated time point, suggesting that destruction of developing interneurons is not the  
15 mechanism for the observed interneuron phenotype (Suppl. Fig. 3). Quantification of the number  
16 of inhibitory neurons at 2dpf was impossible since migrating cells form dense clusters and thus,  
17 we were unable to identify single GFP-expressing cells at this age. However, we observed  
18 differences in the developing brain of *pcdh19*<sup>+/-</sup> larvae. While inhibitory neurons in WT embryos  
19 start to form distinct clusters in the thalamic brain regions at 2dpf, it appeared that *pcdh19*<sup>+/-</sup>  
20 mutant brains had immature patterns of GFP-expressing neurons with overall smaller cell  
21 clusters (Figure 5C). These are reminiscent of earlier stages of brain development, suggesting  
22 transiently delayed development that recovers to normal by 5dpf. Quantification showed a  
23 significantly reduced GFP-fluorescent area in *pcdh19* KO larvae compared to WT larvae,

1 indicating either that fewer inhibitory neurons are present, or they are more densely clustered at  
2 this stage (Suppl. Fig 2F). Together these results suggest that *Pcdh19* plays a part in the  
3 development of the inhibitory neuronal network and a disruption of *Pcdh19* function appears to  
4 have a stronger effect in heterozygous *pcdh19* KO animals than mosaic mutants. The observation  
5 of reduced inhibitory neurons only in heterozygous KO mutants is in line with the overall  
6 strongest behavioral seizure phenotype in heterozygous KO mutants (as seen in Fig.4A and B).

7  
8 **Mutant *pcdh19* zebrafish do not display evidence of anxiety or impaired spatial**  
9 **learning.**

10 Because patients with *PCDH19* variants often display neuropsychiatric comorbidities with  
11 intellectual disability and/or autism, behavioral dysregulation, and obsessive features (Samanta,  
12 2020), we evaluated our *pcdh19* zebrafish mutants for learning defects and features of anxiety,  
13 which have established correlates in zebrafish. We found no difference between mutant and  
14 control larvae using the thigmotaxis, or wall-hugging, assay for larval zebrafish, which is  
15 considered a correlate for anxiety (Schnorr et al., 2012). WT and scrambled injected larvae spend  
16 on average 71.8% and 70.9% of the time ‘hugging’ the wall, while this proportion is increased to  
17 88.5% in WT larvae treated with the anxiogenic caffeine, indicative for increased anxiety levels  
18 (50 mg/L) (Figure 6A and B). We did not observe a statistically significant difference in the wall-  
19 hugging behavior of *pcdh19*<sup>-/-</sup> KO or mosaic mutants compared to their respective controls, and  
20 we observed a significant reduction of thigmotaxis in *pcdh19*<sup>+/-</sup> fish. As neuropsychiatric  
21 dysfunction tends to exacerbate with age in human *PCDH19*-CE, we also looked at older *pcdh19*  
22 mutant fish. We found weak evidence for anxiety-like behavior only in *pcdh19* mosaic mutants in  
23 the bottom dwelling test using adult zebrafish (Figure 6C,D,E). While WT fish spent on average  
24 93±61sec in total in the top compartment of the test tank, *pcdh19*<sup>+/-</sup> and *pcdh19*<sup>-/-</sup> fish tend to  
25 spend more of time in the top (127±85, 151±56sec respectively), indicating no anxiety-like  
26 behavior. Scrambled and mosaic injected adults spent even more time in the top compartment  
27 but to a similar degree (Figure 6D). Interestingly, the mosaic *pcdh19* mutants had significantly  
28 more zone transitions compared to the scrambled injected and *pcdh19* KO fish (Figure 6E), a  
29 behavior that is consistent with anxiety-like behavior. However, this group was also the only group  
30 in which almost all of tested animals entered the top compartment at least once, while in all other  
31 groups a substantial proportion of fish remained motionless at the bottom of the tank (Figure 6F).  
32 Based on these findings, we conclude that *pcdh19* KO mutant zebrafish do not display a strikingly  
33 increased anxiety-like phenotype, while *pcdh19* mosaic mutants show tendencies towards an  
34 anxiety-related phenotype.

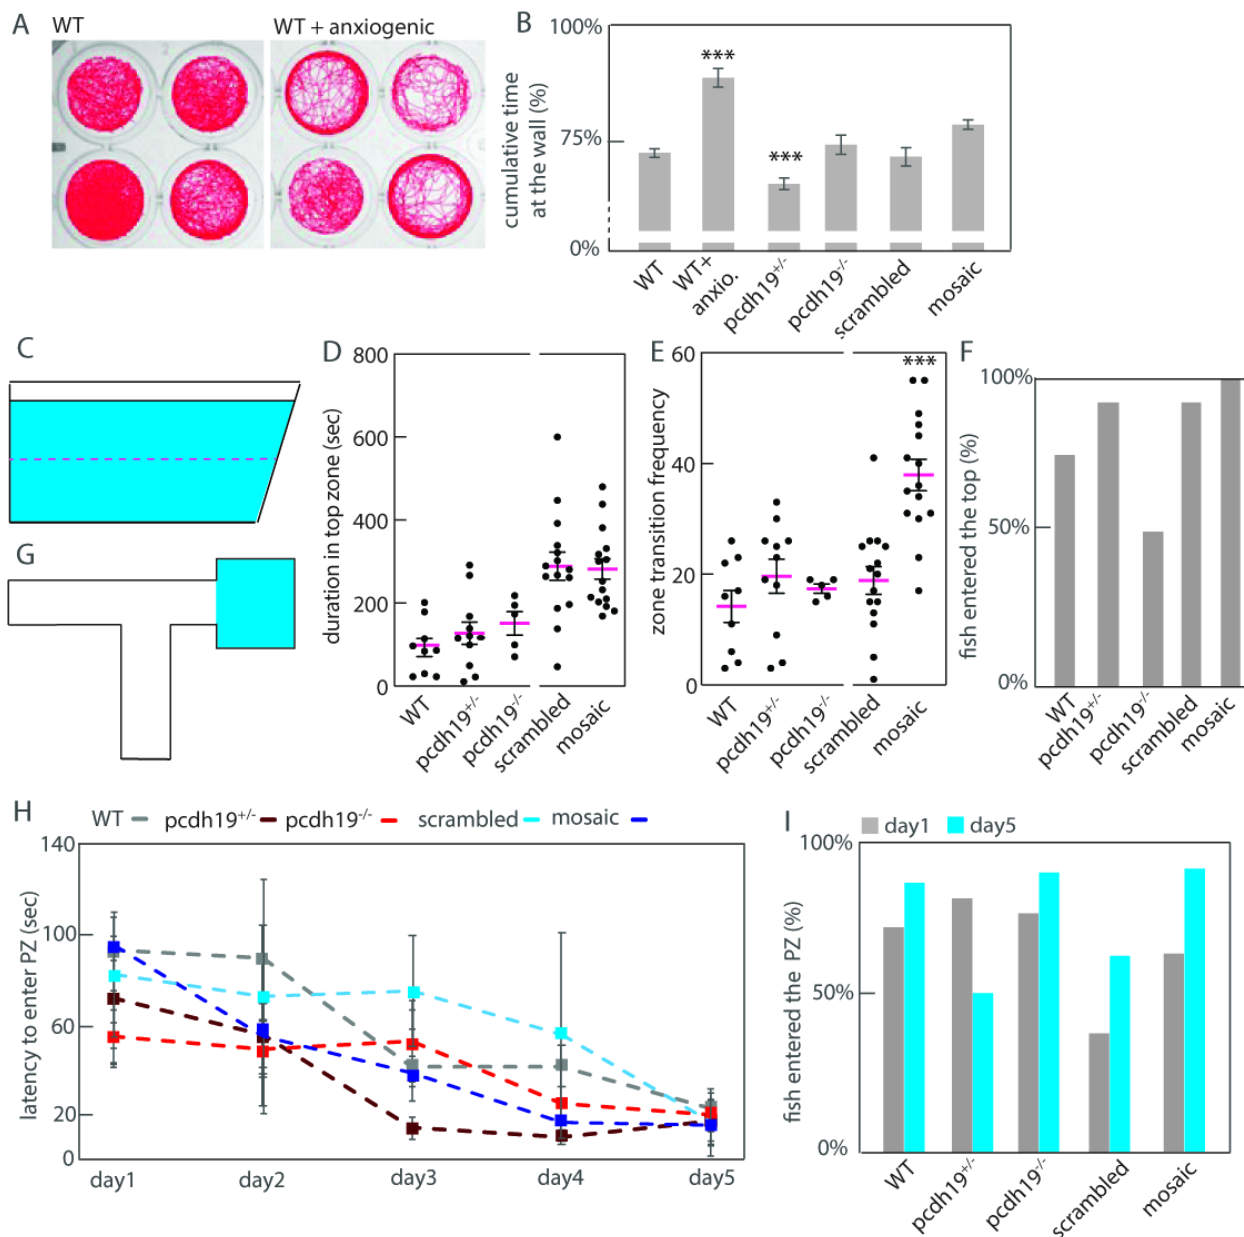

1  
2 **Figure 6:** Behavioral paradigms to assess for features of anxiety and learning defects in zebrafish. (A) Movement plots  
3 of 4 representative WT larvae untreated and treated with the anxiogenic caffeine in a 24-well plate over 30 min. (B)  
4 Quantification of the time spent at the wall shows only larvae treated with the anxiogenic spend more time at the  
5 borders of the well, while *pcdh19*<sup>+/-</sup> larvae spent significantly less time close to the wall. n=367 WT, n=311 *pcdh19*<sup>+/-</sup>,  
6 n=91 *pcdh19*<sup>-/-</sup>, n=283 mosaic, n=60 scrambled, n=59 WT+caffeine treated leave, one-way ANOVA with Tukey's  
7 multiple comparisons test, \*\*\*p<0.001. (C) Schematic of the bottom-dwelling test tank. (D) Quantification of the  
8 duration the adult zebrafish spent in the top compartment of the test tank, that is unchanged between control and  
9 *pcdh19* mutant animals. (E) The frequency of transitions between bottom and top compartment is significantly  
10 increased in mosaic *pcdh19* mutants compared to their controls. (F) The percentage of fish that entered the top  
11 compartment is lower for WT and *pcdh19*<sup>-/-</sup> fish compared to the other groups. n=12 WT, n=12 *pcdh19*<sup>+/-</sup>, n=10 *pcdh19*<sup>-/-</sup>,  
12 n=15 mosaic, n=15 scrambled fish, one-way ANOVA with Sidak's multiple comparisons test, p<0.0001. (G)  
13 Schematic of the T-maze tank. The blue compartment depicts the preference zone (PZ). (H) Average latency to enter  
14 the PZ on the 5 consecutive training days is similar for all compared groups. (I) The percentage of fish that entered the

1 PZ on day1 or 5 varies between groups. n=36 WT, n=28 *pcdh19*<sup>+/+</sup>, n=36 *pcdh19*<sup>-/-</sup>, n=64 mosaic, n=16 scrambled fish,  
2 one-way ANOVA with Dunnett `s multiple comparisons test.

3 Using the T-maze test with adult zebrafish (Figure 6G), we found no defects in the learning  
4 capabilities of *pcdh19* mutants. Both, the performance of mutant and the WT increased similarly  
5 over the duration of the trial. The average latency for WT zebrafish to reach the preference zone  
6 (PZ) went down from 93.7±76s on day 1 to 23.5±41s on day 5, this was a 4fold and statistically  
7 significant improvement in reaching the preference zone (Figure 6H). Comparably, all mutant  
8 *pcdh19* zebrafish improved significantly from day1 to day5 with mosaic and *pcdh19*<sup>+/+</sup> animals  
9 showing the most dramatic response (with 6.4- and 4.1-fold improvement respectively), *pcdh19*  
10 <sup>-/-</sup> performance improved the least (2.7-fold improvement relative to day 1). Comparing latency to  
11 reach the preference zone on day 1 or on day 5 between WT and *pcdh19* mutants did not show any  
12 significant differences (Figure 6H). However, a considerable number of fish were excluded from  
13 the analysis because they either failed to move during the 5min recording period or failed to reach  
14 the preference zone (Figure 6I). Together, these results show that both, mosaic and non-mosaic  
15 *pcdh19* mutants did not show overt signs of increased anxiety or cognitive decline compared to  
16 age-matched control animals, indicating that distinct Pcdh19 expression patterns have no severe  
17 impact on learning and memory or anxiety in 4- to 5-month-old zebrafish.

## 18 **Discussion**

19 A prevailing hypothesis is that human *PCDH19*-associated disease phenotypes result from the  
20 presence of cellular mosaicism in the brain, with clusters of neurons expressing WT and others  
21 expressing mutant PCDH19 protein. To test this hypothesis, we assayed both mosaic and non-  
22 mosaic *pcdh19* loss-of-function zebrafish larvae for features related to epilepsy and comorbid  
23 features associated with human disease, as well as for underlying neurodevelopmental  
24 abnormalities that might be responsible for these features. Our most striking finding was  
25 abnormal hyperexcitability in mosaic and non-mosaic LOF larvae, as evidenced by spontaneous  
26 epileptiform discharges observed by electrophysiological recording. This is a feature associated  
27 with epilepsy previously shown in a zebrafish model for Dravet syndrome (Baraban et al., 2013).  
28 These findings were confirmed by using multiple *pcdh19* LOF lines and by acutely injecting a  
29 different sgRNA to target *pcdh19* at a distinct genomic position. Surprisingly, we saw only limited  
30 indications of abnormal excitability using GCaMP-mediated calcium imaging and behavioral  
31 based locomotor activity paradigms both at baseline and during provoking conditions using light,  
32 heat and the proconvulsant PTZ at different concentrations, all established methods to assay  
33 hyperexcitable states in zebrafish (Afrikanova et al., 2013; Hortopan et al., 2010; Hunt et al., 2012;  
34 Liu and Baraban, 2019). Using these assays, the strongest hyperexcitability phenotype was  
35 observed in non-mosaic, heterozygous *pcdh19* mutant larvae showing spontaneous and PTZ-  
36 induced behavioral seizures as well as abnormal calcium events. We conclude that the nature of  
37 the pathology, and its resultant hyperexcitability, generated by mosaic and non-mosaic *pcdh19*  
38 LOF mutations in zebrafish larvae requires a sensitive detection method (tectal LFP recordings)  
39 to consistently identify evidence of hyperexcitability in all lines. Indeed, the lack of seizure-like  
40 events using behavioral assays in the setting of a hyperexcitable neuronal network is not an  
41 uncommon phenomenon, as recently demonstrated in a large zebrafish epilepsy screen (Griffin  
42 et al., 2021).

1 Relative changes in pERK antibody fluorescence, employed to provide neuroanatomical  
2 localization of neuronal activity (Thyme et al., 2019), showed complex results in our mosaic and  
3 non-mosaic *pcdh19* mutants. Mosaic mutants showed marked changes in neuronal activity in a  
4 widespread pattern which partly overlaps with tectum, but heterozygous *pcdh19*<sup>+/-</sup> mutants—the  
5 same genotype that showed evidence of hyperexcitability by other modalities—showed more  
6 subtle abnormalities using pERK fluorescence. Since this method only visualizes changes in  
7 neuronal activity that occurred approximately 10min prior to preparation, it may not be ideally  
8 suited to image short, transient events such as seizures. The abnormal pERK patterns found in  
9 the mosaic mutants may therefore represent longer lasting, persistent changes in neuronal  
10 activity patterns that are different from the non-mosaic *pcdh19* lines and may not represent the  
11 presence of seizures as such but rather a baseline, tonic hyperexcitable state.

12 In order to further explain the *pcdh19* mutant hyperexcitability phenotype, we assessed neuronal  
13 numbers. We observed reduced numbers of inhibitory neurons at 2dpf and 5dpf with normal  
14 TUNEL staining in heterozygous LOF mutants. This observation represents a change that may  
15 underlie with a hyperexcitable neuronal network. Our results suggest a failure of development of  
16 inhibitory neurons in heterozygous *pcdh19* KO mutants that is not observed in mosaic LOF  
17 mutants, Interestingly this correlates with the more severe hyperexcitability phenotype present  
18 in heterozygous *pcdh19* mutants. Consistent with our findings, experiments silencing *Pcdh19* in  
19 cultured rat neurons showed reduced GABA<sub>A</sub>R and GAD65/67-positive puncta and reduced  
20 mIPSC frequency with slower decay kinetics, suggesting a *Pcdh19*- mediated mechanism is  
21 necessary for the composition and function of the inhibitory synapse (Bassani et al., 2018).

22 Common neuropsychiatric features of the human PCDH19-related disorder include intellectual  
23 disability, autism, and obsessive-compulsive disorder which tend to worsen over time (Samanta,  
24 2020). We therefore evaluated not only larval but also adult zebrafish for these abnormalities.  
25 Similar to published reports in mice that assessed changes in anxiety and memory-related  
26 behavior (Hayashi et al., 2017; Pederick et al., 2016), none of the adult fish displayed consistent  
27 or striking abnormalities in behavior using two different tests that assess cognitive performance  
28 and anxiety-like states. The discrepancy between the severe neuropsychiatric comorbidities in  
29 humans and the rather mild reported phenotypes in mice and zebrafish, if any, suggest that  
30 human brain function is more sensitive to PCDH19 LOF or that existing animal models are less  
31 sensitive either due to genetic background effects, limitations of existing behavioral assays to  
32 reveal *pcdh19*-related phenotypes, or a unique requirement for PCDH19 in the human brain.

33 The extent to which non-mosaic *Pcdh19* LOF contributes to abnormal hyperexcitability and  
34 epilepsy remains an unresolved question. As the prevailing theory postulates that cellular  
35 interference in the setting of mosaic LOF is required for a phenotype (Pederick et al., 2018), we  
36 conclude that an alternative mechanism based on haploinsufficiency must play a role to account  
37 for our observations that are consistent with hyperexcitability in non-mosaic heterozygous or  
38 homozygous *pcdh19* mutant zebrafish. This hypothesis is supported by the presence of behavioral  
39 abnormalities in human male carriers (our own unpublished observations), abnormalities in  
40 neuronal network development and function in the optic tectum of *Pcdh19* mutant zebrafish  
41 (Light et al 2019; Cooper 2015), and abnormalities in *pcdh19* KO mice. This study showed  
42 heightened evoked seizure susceptibility in both female *Pcdh19*<sup>+/-</sup> (X-linked mosaic) and female  
43 *Pcdh19*<sup>-/-</sup> (non-mosaic) mice compared to WT and male hemizygous mice (Rakotomamonjy et al.,

1 2020), strengthening the hypothesis that mosaicism-independent mechanisms also contribute to  
2 *PCDH19* disease phenotypes.

3 The differences and the lack of a clear correlation between genotype and phenotype that is seen  
4 across zebrafish with mosaic, heterozygous, and homozygous *pcdh19* mutations are reminiscent  
5 of differences observed in studies of other model systems, including mouse models of epilepsy  
6 (Wang and Frankel, 2021). Given that the protocadherin gene family is well-conserved across  
7 species, and that the zebrafish *pcdh19* gene shares 73% homology with human *PCDH19* (Blevins  
8 et al., 2011; Wu, 2005), the zebrafish systems allow for robust evaluation of phenotypes that  
9 correlate with human patients with pathogenic variants in *PCDH19*. Indeed, zebrafish models of  
10 other genetic epilepsies have been well described and even used successfully in drug screens  
11 (Baraban et al., 2013; Eimon et al., 2018; Grone et al., 2016). The lack of spontaneous behavioral  
12 seizures in the mosaic or non-mosaic *Pcdh19* LOF fish, despite abnormal electrophysiological  
13 findings, does not diminish the significance of the positive findings observed and is consistent  
14 with several previously reported models of genes responsible for human epilepsy. A recent large-  
15 scale epilepsy screen reported a low prevalence of behavioral seizures in a set of 40 zebrafish lines  
16 with variants in catastrophic childhood epilepsy genes as well as surprisingly low prevalence of  
17 epileptiform abnormalities in electrophysiological recordings (Griffin et al., 2021). Due to  
18 technical limitations, we could not test for the presence of segregated and abnormally clustered  
19 cell populations in the brain in the mosaic mutants. Furthermore, zebrafish larvae are not sexually  
20 dimorphic and thus, this disease model does not allow for the evaluation of sex-dependent  
21 differences. Given that the most consistent phenotypic abnormality relied on electrophysiological  
22 experiments, we advocate for including such experiments in drug screens for the identification of  
23 novel therapeutic compounds to target *pcdh19* dysfunction, which are readily feasible in zebrafish  
24 larvae (Griffin et al., 2021). Evaluation of some of these aspects in mouse models may allow  
25 additional understanding of the role of *PCDH19* in brain development and epilepsy (Hoshina et  
26 al., 2021; Pederick et al., 2018).

27 In summary, we demonstrate that mosaic and non-mosaic *pcdh19* mutant zebrafish recapitulate  
28 several features of human *PCDH19*-CE, including the core feature of brain hyperexcitability in the  
29 zebrafish models that correlates with the network dysfunction resulting in epilepsy in human  
30 patients. We provide evidence suggesting that the mechanism for hyperexcitability in non-mosaic  
31 *Pcdh19* mutants may involve abnormal inhibitory neuron development. Understanding the  
32 molecular basis of brain dysfunction that arises from mosaic and non-mosaic mutant *Pcdh19*  
33 expression provides a fundamental step towards understanding *PCDH19*-CE disease  
34 mechanisms, fostering future studies to develop mechanism-based strategies to treat symptoms.  
35 Specifically, single-cell RNA sequencing experiments would help to identify abnormal molecular  
36 pathways in mosaic or KO loss of function mutants that could lay the foundation for targeted  
37 treatment options. For example, the reduction of inhibitory neurons during development suggests  
38 that modifying GABAergic activity, which can be achieved pharmacologically in patients with  
39 some classes of anti-seizure medications (e.g., benzodiazepines, barbiturates), may represent a  
40 more effective treatment mechanism than many of the other mechanisms of conventional anti-  
41 seizure medications.

## 42 **Material and Methods**

## 1 Zebrafish Maintenance

2 All zebrafish experiments were approved and conducted in accordance with the standards of the  
3 Boston Children's Hospital (BCH) Institutional Animal Care and Use Committee (IACUC). Fish  
4 were maintained at 79°F on a 10h-14h dark-light cycle in a dedicated zebrafish core facility. All  
5 experiments were performed in *Danio rerio* strain AB or TAB.

## 6 Guide RNA design and microinjections

7 Single guide RNAs (sgRNAs) were designed using the CHOPCHOP online tool v1  
8 (<https://chopchop.rc.fas.harvard.edu>) and selected using its ranking algorithm based on target  
9 specificity and minimization of off-target effects. We used *pcdh19* sgRNAs targeting the beginning  
10 of exon 1 and exon 2 to maximize loss-of-function of the protein, based on our observation that  
11 most patient mutations are located on exon 1, with a few in exon 2, and almost none in the  
12 remaining exons. Microinjections into embryos at the one-cell stage were performed as described  
13 previously (Dentici et al., 2021) with a mixture of 1µl synthetic guide RNAs (*pcdh19* oligo 2/exon1:  
14 GGTGTATTTCAAATTGAACA or *pcdh19* oligo 3/exon 2: GGAGACGGACAAGATGAATG at  
15 2000ng/µl, Synthego, Redwood City, CA, USA) and 1µl recombinant Cas9 protein (1 µg/µl, PNA  
16 Bio, Thousand Oaks, CA, USA) and 2µl RNase-free water. For control experiments, a scrambled  
17 sgRNA (ACAAGGAGGTAGGCGAGAAC) that does not target zebrafish DNA was injected. A total  
18 of 2nl mix per embryo was injected using clipped glass capillaries and a microinjector.

## 19 Genotyping and PCR

20 To determine sgRNA efficiency and to confirm the different genotypes in *pcdh19* KO fish, fin clips  
21 were cut from adult 3-month-old fish and DNA extracted using the HotShot protocol (Meeker et  
22 al., 2007). Euthanized larvae were dissolved in 50µl 50mM NaOH by heating for 20min to 95°C  
23 followed by addition of 5µl 1M Tris solution. Subsequent PCR using 2xPlatinum Taq polymerase  
24 and Sanger sequencing was performed with primers summarized in Table 1. The amount of indels  
25 in *pcdh19* mosaic larvae and the potentially resulting knockdown percentage was determined via  
26 Inference of CRISPR Edits (ICE) analysis  
27 (<https://www.synthego.com/products/bioinformatics/crispr-analysis>).

28 **Table 1:** Primers used in PCR and qPCR

| gene                 | Forward primer         | Reverse primer        |
|----------------------|------------------------|-----------------------|
| <i>pcdh19</i> exon 1 | TGCCAGACTGTGATTTTGTTCG | TGCTTGGTGATGAGCAGTCC  |
| <i>pcdh19</i> exon 2 | CGTGCCGCCAATGAATATGG   | AAGGTGTGGTGGTAGCCATG  |
| <i>pcdh19</i> qPCR   | GCGACCAAACAGACAGTGAA   | TCCGTGTTCCGGAGACTTAG  |
| <i>gapdh</i>         | GTGGAGTCTACTGGTGTCTTC  | GTGCAGGAGGCATTGCTTACA |

29

## 30 Assessment for spontaneous and induced seizures

31 At 6dpf larvae with *pcdh19* mutations were transferred into wells (one each) of a 96-well plate,  
32 placed into the DanioVision video-tracking system (Noldus, Wageningen, Netherlands), and  
33 tracked with the Ethovision software after a 20-minute acclimation period. For 60min, baseline  
34 swim patterns were recorded and evaluated for seizure-like episodes.

35 *PTZ protocol:* Larvae were subjected to a 30min exposure to 2 different concentrations of  
36 pentylenetetrazole (PTZ) (0.1mM and 2.5mM).



1           *Strobe light protocol:* Larvae were subjected to 10min of darkness, three repetitions of  
2 strobe light bursts with different frequencies (1Hz for, 2Hz and 5Hz separated by 30sec of  
3 darkness) with 12min of light exposure as the final stage of the trial.

4           *Hyperthermia protocol:* Individual 6dpf larvae were transferred to a 96-well plate  
5 submerged in room temperature (22°C) water. Baseline swim patterns were recorded for 20min.  
6 Then, the water temperature was slowly elevated over the course of 20min from room  
7 temperature to 37°C, and swim patterns were recorded. Afterwards, swim behavior was assessed  
8 for seizure-like swim patterns and compared to parameters during the baseline period. As a  
9 control for the KO fish lines we used WT animals, and for the mosaic fish we used scrambled  
10 gRNA injected animals.

11 For the analysis, parameters including total distance moved and maximal velocity for each fish  
12 were measured in 5-second time bins. Based on these parameters, an automated seizure detection  
13 paradigm was developed and used to identify the presence of seizure-like activity in each animal  
14 per time bin (Lin et al., 2018).

#### 15 Behavioral tests

16 T-maze cognition test. We designed an asymmetrical T-maze that has one bigger compartment  
17 on the right arm versus the left arm. The bigger compartment represents the preference zone (PZ)  
18 which is more favorable since its bigger and enriched, which fish are expected to seek out and stay  
19 in (Darland and Dowling, 2001). Adult fish (4-5 months old) were released to the maze and are  
20 allowed to explore for 5min once a day for 5 consecutive days. The latency from entering the maze  
21 to reaching the preference zone as well as the cumulative time the fish spend in the preference  
22 zone were analyzed for each fish. Fish that did not move during the whole trial or that did not  
23 reach the preference zone were excluded from the analysis. The number of fish that met these  
24 exclusion criteria are reported for each genotype.

25 Bottom dwelling anxiety test. Single, adult, naive fish were placed in a rectangular shaped tank  
26 which was virtually divided into upper and lower halves. Their swim behavior was recorded  
27 immediately after placement into the new tank for 10min. When exposed to a new environment  
28 fish initially seek out the darker, “protective” bottom of a tank to avoid detection by predators and  
29 subsequent vertical exploration behavior (Kysil et al., 2017). The higher the anxiety score, the  
30 longer the fish stay in the bottom compartment or the more often they will return to the bottom  
31 after short episodes of exploring the top compartment. Time spent at the top and bottom-to-top  
32 transitions were assessed for each fish.

#### 33 Transcriptional analysis.

34 RNA was isolated from zebrafish embryos and larvae. For RNA isolation the tissue from 20 larvae  
35 was pooled (to achieve the minimum required RNA concentration), and RNA was then extracted  
36 with the QIAGEN RNA isolation kit (QIAGEN, Boston, MA, USA) according to the manufacturers  
37 guide. For qPCR, 100ug of RNA was reverse transcribed into cDNA using the SuperScript III  
38 (Invitrogen, Waltham, USA) kit according to manufacturer’s instructions. qPCR was performed  
39 on a QuantStudio 3 -96-Well 0.1-mL Block and the SYBR green PowerUp kit (Applied Biosystems,  
40 Bedford, MA, USA) according to manufacturer’s instructions. Standard curves were obtained for  
41 each used primer pair (Table 1), and efficiencies were above 1.8 for each combination.

#### 42 LFP recordings

1 Electrophysiological recordings were obtained from larval zebrafish using previously described  
2 methods (Baraban et al., 2013). Larval zebrafish (6 to 7dpf) were paralyzed with alpha-  
3 bungarotoxin 2mg/ml (Invitrogen, Waltham, USA), then embedded dorsal side up in 50 $\mu$ l of 1.2%  
4 low-melting point agarose (Fisher Scientific, Cambridge, MA, USA) on a recording chamber. The  
5 chamber was placed under a Nikon Eclipse FN1 microscope and perfused with zebrafish recording  
6 solution containing: 117mM NaCl, 4.7mM KCl, 2.5mM NaHCO<sub>3</sub>, 2.5mM CaCl<sub>2</sub>, 1.2mM MgCl<sub>2</sub>,  
7 1.2mM NaH<sub>2</sub>PO<sub>4</sub>, 11mM glucose (Sigma-Aldrich, Natick, MA, USA) dissolved in distilled water,  
8 brought to a pH of 7.4, and vacuum-filtered through a 0.22 $\mu$ m filter. The specimen was perfused  
9 with warm (28.5 $^{\circ}$ C) recording solution at a rate of 1-2ml/min throughout the recording. A  
10 borosilicate glass electrode (1-7M $\Omega$  resistance) filled with 2M NaCl was placed in the optic tectum  
11 using a micromanipulator with visual guidance under the light microscope. Local field potential  
12 (LFP) recordings were collected using Clampex software (Molecular Devices, Sunnyvale, USA).  
13 All recordings were performed in current-clamp mode, low-pass filtered at 1Hz, high-pass filtered  
14 at 1kHz, amplified at a gain of 500x, and sampled at 10kHz (Axopatch 200B amplifier, Digidata  
15 1440A digitizer, Molecular Devices, Sunnyvale, USA). After a baseline recording of 50min, PTZ  
16 40mM (dissolved in recording solution) was added to the recording chamber. The recording  
17 continued for 20min after the addition of PTZ. Fish were observed under the microscope  
18 frequently throughout the experiment for presence of heartbeat and circulation in the head and  
19 absence of movement. Only recordings with a visible heartbeat throughout were included in the  
20 analysis.

#### 21 Analysis of LFP data

22 All electrophysiology was analyzed with a custom MATLAB software framework developed by an  
23 investigator blind to status of the experiment. The framework first passes the raw data through a  
24 filtering stage – based on the Savitzky–Golay filtering algorithm. The software uses the filtered  
25 voltages to automatically detect the measurement noise floor by fitting the core of the histogram  
26 of the filtered voltages with a Gaussian distribution. This noise floor (0.006 - 0.012mV) allows for  
27 a robust detection of all spikes. These spikes are further categorized into small amplitude events  
28 (SAE) and large amplitude events (LAE) based on their signal amplitude. This distinction into  
29 small and large amplitude event can be directly obtained from a histogram of all detected spike  
30 amplitudes in which we observe two distinct features: a narrow peak with low signal amplitude  
31 (referred to as the SAE) and a second broad peak with large signal amplitude (referred to as the  
32 LAE). The threshold discriminating between small and large amplitude events is 0.08-0.12mV  
33 depending on the noise (after completion of the manuscript, the authors became aware of a related  
34 classification (Griffin et al., 2021)). A final stage of the software groups the detected large  
35 amplitude events into bursts in case the following event occurs within a 1 second time window.  
36 This is summarized as the burst frequency, the frequency with which the bursts occur throughout  
37 the experiments.

38 The MATLAB code can be downloaded here:  
39 [https://github.com/CarstenRobens/EEG\\_SpikeFinder](https://github.com/CarstenRobens/EEG_SpikeFinder)

#### 40 Calcium imaging

41 *Pcdh19* mutant zebrafish were crossed with Tg(elav3:GCaMP6s); *mitfa*<sup>nac/nac</sup> (abbreviated,  
42 GCaMP6) zebrafish in the nacre background to achieve GCaMP6-expressing, transparent *pcdh19*  
43 mutant lines. Heterozygous *pcdh19* mutants were bred for Ca<sup>2+</sup> fluorescence detection at 6dpf.

1 To this end, individual unrestrained larvae were placed into a well of a 96-well optical plate in  
2 100 $\mu$ l fish water compatible with the Hamamatsu FDSS7000EX fluorescent plate reader. The fish  
3 were not evaluated for 20min to allow time for them to acclimate to the new environment.  
4 Specimens were illuminated from above via Xenon lamp passed through a 480nm filter.  
5 Epifluorescence from below the specimen is passed through a 540nm filter and collected by CCD,  
6 allowing all wells to be recorded simultaneously. Data is sampled at approximately 12.7Hz  
7 (79msec interval), 16-bit pixel depth and 2x2 binning. Fish were recorded for 30min untreated,  
8 30min treated with 1mM and 30min treated with 10mM PTZ. Afterwards heartbeat is assessed  
9 and DNA is extracted for genotype determination. Analysis is performed in MATLAB to extract  
10 position, linear and angular velocity, and changes in calcium fluorescence using a moving average  
11  $\Delta F/F_0$  method.

12 For high-resolution Calcium imaging, living GCaMP6 larvae (5-7dpf) were immobilized with  
13 5mM tubocurarine and embedded in 1.2% agarose for imaging using a Zeiss Lightsheet.Z1  
14 microscope equipped with 20X/1.0 NA objective. Calcium fluorescence was stimulated by two co-  
15 planar light sheets positioned at 90 degrees from the detection axis using 488nm laser. To assess  
16 abnormalities in spontaneous brain activity, two paradigms were used: A) whole brain activity,  
17 encompassing ~13 slices with 22 $\mu$ M slice interval at a rate of 1.8seconds per stack; B) z-section  
18 through optic tectum at 10Hz. Samples were immersed in temperature-controlled fish water  
19 (28°C) during imaging. Circulation was assessed by transmitted light to confirm vitality of the  
20 specimen at the beginning and end of each recording. Analysis was performed in Zen Black  
21 software (Zeiss, Jena, Germany).

#### 22 Analysis of FDSS data

23 An algorithm to track changes in calcium activity using a "moving  $\Delta F/F_0$ " was devised. The  
24 method normalizes the instantaneous average fluorescence for the area of the fish body within the  
25 well by the following formula: (average  $F_{\text{fish}}(t) - F_0$ )/ $F_0$ , where  $F_0$  = average  $F_{\text{fish}}$  (averaged over  
26 each pixel, for each time sample), and smoothed with a 1000-sample (~79sec) boxcar moving  
27 average. For detecting events, the  $F/F_0$  time-series is further smoothed with a 25-sample  
28 (~1.975sec) boxcar moving average. Fish movement is tracked and position, linear velocity,  
29 angular velocity estimated. Events are initially detected by identifying peaks that exceeded an  
30 empirically determined permissive threshold ( $>0.05$ ), while the start and end of each event is then  
31 identified by the zero-crossing of the smoothed 1st derivative. Subsequently, 47 measurements  
32 for each event are obtained related to intensity, distance traveled, linear velocity, angular velocity,  
33 total revolutions, and others. Additional measurements for the time-series include total distance,  
34 maximum/minimum intensity, and total fish size. Calcium events whose max intensity  $F/F_0$   
35 exceeded 0.1 were retained as significant.

36 The code to analyze FDSS calcium imaging data can be downloaded here:  
37 <https://drive.google.com/file/d/1Gw97gxSiwIE4bFYv7rohNAhvAYUiUixk/view?usp=sharing>

#### 38 Phosphorylated extracellular signal-related kinase (pERK) staining

39 pERK staining was performed as described elsewhere with minor modifications (Thyme et al.,  
40 2019). Briefly, zebrafish larvae were collected and pooled at 5dpf, given 20min to acclimate in a  
41 quiet room and then were quickly fixed in 4% Paraformaldehyde (PFA) + 0.25% Triton X  
42 overnight. Pigmentation was removed by bleaching for 10min in sterile fish water containing 3%

1 H<sub>2</sub>O<sub>2</sub>, 1% KOH. Samples were washed three times with PBST (PBS with 0.25% Triton X). Antigen  
2 retrieval was performed first by incubation of samples in 150mM Tris HCl pH 9.0 for 5min  
3 followed by 70°C for 15min. Afterwards, they were washed twice with PBST, for 5min each. The  
4 larvae were then permeabilized by incubation in 0.05% Trypsin-EDTA on ice for 45min and  
5 subsequently washed three times in PBST. Samples were incubated in blocking solution  
6 containing 2% Normal Goat Serum, 1% Bovine Serum Albumin, and 1% DMSO in PBST for  
7 1h. Larvae were incubated with pERK and tERK antibodies in 1% BSA and 1% DMSO in PBST for  
8 48h at 4°C on a rocker. Primary antibodies: mouse anti-total ERK (p44/p42 MAPK (Erk 1/2)  
9 (L34F12) mouse mAb Cell Signaling #4696) 1:100, rabbit anti-phospho-ERK (Phospho-p44/42  
10 MAPK (Erk1/2) (Thr202/Tyr204) rabbit mAb Cell Signaling #4370) 1:400. After incubation  
11 samples were washed with PBST three times for 15min followed by incubation with the secondary  
12 antibody solution (donkey anti-rabbit Alexa Fluor 488 (Invitrogen A21206) 1:200, goat anti-  
13 mouse Alexa Fluor 647 (Invitrogen A32728) 1:200) overnight on a rocker at 4°C. Samples were  
14 washed three times, 15min each with PBST and stored in PBST at 4°C until imaging. Genotypes  
15 were determined after imaging. Analysis of pERK-tERK staining ratio was performed as  
16 previously described (Thyme et al., 2019).

17

### 18 Confocal Imaging

19 Transgenic Tg(dx6a-1.4kbdlx5a/dlx6a:GFP::vglut2:DsRed) animals (kindly donated by Ellen  
20 Hoffman, Yale School of Medicine, New Haven (Hoffman et al., 2016)) were crossed into the  
21 transparent mitfa background and then with our *pcdh19* mutants, resulting in loss of  
22 pigmentation and expression of GFP in inhibitory dlx6/5-positive neurons and dsRed in excitatory  
23 vGlut2-positive neurons. Adults of this line were allowed to breed for 1h and then all eggs were  
24 collected and held at low densities to avoid crowding related maturation delays. Despite the low  
25 density, we observed a gradient of maturity in very young larvae, therefore 2dpf larvae used for  
26 imaging and analysis were benchmarked based on general developmental milestones (Kimmel et  
27 al., 1995) to ensure the use of developmentally matched larvae for experiments. Only hatched  
28 larvae that reached at least the long-pec phase with obvious markers of whole-body maturity were  
29 included for subsequent brain analysis. Larvae were 4%PFA fixed at 2dpf or 5dpf over night for  
30 confocal imaging. Fixed larvae were mounted dorsally in 1.2% agarose and GFP and dsRed  
31 fluorescence was imaged immediately after on a Zeiss LSM700 with 15µm step size and a 10x  
32 objective lens. For imaging of *pcdh19* mosaic mutants, wildtype transgenic zebrafish were bred  
33 and *pcdh19* sgRNAs or scrambled sgRNA was injected into the 1-cell stage.

### 34 TUNEL assay

35 Zebrafish larvae were fixed overnight in 4% PFA + 0.25% Triton X and washed in PBST.  
36 Pigmentation was removed with 10min bleaching in 3% H<sub>2</sub>O<sub>2</sub>, 1% KOH in sterile fish water.  
37 Samples were incubated in 150mM Tris HCl pH 9.0 for 5min at room temperature, then at 70°C  
38 for 15min. Permeabilization was performed in 0.05% Trypsin-EDTA on ice for 45min. Afterwards  
39 samples were incubated for 2 h in the In Situ Cell Death Detection Kit (Roche, Basel, Switzerland)  
40 enzyme labeling solution at 37°C. Prior to imaging, samples were counterstained in 300nM DAPI  
41 for 30min.

42

### 43 Image Analysis

1 For cell counting in transgenic *pcdh19* mutants, z-stacks of confocal images were analyzed with  
2 genotypes blinded to the user, using ImageJ software. After background subtraction and noise  
3 smoothing, a threshold was determined that includes most cells of the tectum and minimizes  
4 background fluorescence. Very bright cells were automatically separated in ImageJ using the  
5 watershed function. The average number of all cells counted in the tectum of each zebrafish line  
6 was reported. Since background noise was substantial in the dsRed-expressing cell populations,  
7 we excluded these from the cell counting analysis.

### 8 Western Blot

9 For each sample 10-20 zebrafish heads from the same previously genotyped genetic background  
10 were pooled in RIPA buffer for assessment of Pcdh19 protein levels. Using a tissue homogenizer,  
11 larval heads were homogenized for 35-45s on ice, until the samples was uniformly cloudy. Protein  
12 was pelleted by centrifugation at 14000rpm for 15min at 4C and resuspended in 20 $\mu$ l buffer for  
13 subsequent BCA assay to estimate protein concentration. An equal protein amount was used and  
14 mixed with 5 $\mu$ l of 4x Blot sample buffer and DI water and heated for 5min at 95 $^{\circ}$ C. Samples and  
15 protein marker were loaded on an SDS-polyacrylamide gel and then blotted on to a PVDF  
16 membrane that was pretreated with 100% methanol for 5min and then transferred to 1x transfer  
17 buffer. After successful blotting, membranes were blocked in blocking buffer for 1h on a shaker.  
18 Primary antibodies were applied in blocking buffer at 4 $^{\circ}$ C over-night (alpha-tubulin, Abcam  
19 ab233661, 1:1000 dilution and Pcdh19, Abcam ab191198, in 1:200 dilution). After 3 wash steps in  
20 PBS-T (0.1% triton), secondary antibodies IR-Odyssey were applied in blocking buffer in a  
21 1:10000 dilution for 1h at room temperature. Washed membranes were imaged with the LiCor  
22 Odyssey system.

### 23 Statistical Analysis

24 For all experiments *pcdh19* KO lines were compared to WT and *pcdh19* mosaics were compared  
25 to scrambled injected (and for LFP recordings in addition to scrambled injected mosaics were also  
26 compared to WT and injection controls). All statistical analyses were done using Graphpad Prism  
27 8. Values represent the mean  $\pm$ SEM. All statistical tests used can be found in the corresponding  
28 figure legends. A p-value of  $<0.05$  was determined as statistically significant. N numbers can be  
29 found in the corresponding figure legends.

### 30 **Acknowledgments**

31 Dr. Barbara Robens is supported by the Deutsche Forschungsgemeinschaft (DFG) Germany  
32 research fellowship (#424602704). Dr. McGraw is supported by the CURE Taking Flight Award  
33 and NIH/NINDS Ko8NS118107. Dr. Carsten Robens is supported by the Deutsche  
34 Forschungsgemeinschaft (DFG) Germany research fellowship (#421987027). Drs. Rotenberg and  
35 Poduri were supported by NIH/NINDS Ro1NS100766 and the Boston Children's Hospital  
36 Translational Research Program. Dr. Thyme is supported by NIH/NIMH ROOMH110603 and a  
37 Klingenstein-Simons Foundation Fellowship Award. We thank Dr. Hyun Yong Koh for his  
38 support with the transcriptomic data analysis. We are grateful to Seniha Ipekci, Gessica Truglio,  
39 Brandon Jones, and other past laboratory members who were involved in the early stages of this  
40 project and to the Boston Children's Hospital Aquatic Facility leadership and staff.

### 41 **Author contributions**

1 Conceptualization A.P., B.K.R., experiments performed by B.K.R., X.Y., C.M.M., L.T.,  
2 S.T., analysis performed by B.K.R., X.Y., C.M.M., C.R., S.T., software written by C.M.M.,  
3 C.R., manuscript written by B.K.R., A.P.; resources provided by A.P., A.R.; supervision by  
4 A.P., B.K.R.

## 5 **Competing interests statement**

6 Authors declare no competing financial or non-financial interests in relation to the work.  
7

## 8 **References**

- 9 Afrikanova, T., Serruys, A.S., Buenafe, O.E., Clinckers, R., Smolders, I., de Witte, P.A., Crawford, A.D., and  
10 Esguerra, C.V. (2013). Validation of the zebrafish pentylenetetrazol seizure model: locomotor versus  
11 electrographic responses to antiepileptic drugs. *PLoS One* 8, e54166. [10.1371/journal.pone.0054166](https://doi.org/10.1371/journal.pone.0054166)
- 12 Ashburner, M., Ball, C.A., Blake, J.A., Botstein, D., Butler, H., Cherry, J.M., Davis, A.P., Dolinski, K., Dwight,  
13 S.S., Eppig, J.T., Harris, M.A., Hill, D.P., Issel-Tarver, L., Kasarskis, A., Lewis, S., Matese, J.C., Richardson,  
14 J.E., Ringwald, M., Rubin, G.M., and Sherlock, G. (2000). Gene ontology: tool for the unification of biology.  
15 The Gene Ontology Consortium. *Nat Genet* 25, 25-29. [10.1038/75556](https://doi.org/10.1038/75556)
- 16 Baraban, S.C., Dinday, M.T., and Hortopan, G.A. (2013). Drug screening in Scn1a zebrafish mutant  
17 identifies clemizole as a potential Dravet syndrome treatment. *Nat Commun* 4, 2410.  
18 [10.1038/ncomms3410](https://doi.org/10.1038/ncomms3410)
- 19 Bassani, S., Cwetsch, A.W., Gerosa, L., Serratto, G.M., Folci, A., Hall, I.F., Mazzanti, M., Cancedda, L., and  
20 Passafaro, M. (2018). The female epilepsy protein PCDH19 is a new GABAAR-binding partner that  
21 regulates GABAergic transmission as well as migration and morphological maturation of hippocampal  
22 neurons. *Hum Mol Genet* 27, 1027-1038. [10.1093/hmg/ddy019](https://doi.org/10.1093/hmg/ddy019)
- 23 Blevins, C.J., Emond, M.R., Biswas, S., and Jontes, J.D. (2011). Differential expression, alternative splicing,  
24 and adhesive properties of the zebrafish delta1-protocadherins. *Neuroscience* 199, 523-534.  
25 [10.1016/j.neuroscience.2011.09.061](https://doi.org/10.1016/j.neuroscience.2011.09.061)
- 26 Cooper, S.R., Emond, M.R., Duy, P.Q., Liebau, B.G., Wolman, M.A., and Jontes, J.D. (2015). Protocadherins  
27 control the modular assembly of neuronal columns in the zebrafish optic tectum. *J Cell Biol* 211, 807-814.  
28 [10.1083/jcb.201507108](https://doi.org/10.1083/jcb.201507108)
- 29 Darland, T., and Dowling, J.E. (2001). Behavioral screening for cocaine sensitivity in mutagenized zebrafish.  
30 *Proc Natl Acad Sci U S A* 98, 11691-11696. [10.1073/pnas.191380698](https://doi.org/10.1073/pnas.191380698)
- 31 Dentici, M.L., Alesi, V., Quinodoz, M., Robens, B., Guerin, A., Lebon, S., Poduri, A., Travaglini, L., Graziola,  
32 F., Afenjar, A., Keren, B., Licursi, V., Capuano, A., Dallapiccola, B., Superti-Furga, A., and Novelli, A. (2021).  
33 Biallelic variants in ZNF526 cause a severe neurodevelopmental disorder with microcephaly, bilateral  
34 cataract, epilepsy and simplified gyration. *J Med Genet*. [10.1136/jmedgenet-2020-107430](https://doi.org/10.1136/jmedgenet-2020-107430)
- 35 Depienne, C., Bouteiller, D., Keren, B., Cheuret, E., Poirier, K., Trouillard, O., Benyahia, B., Quelin, C.,  
36 Carpentier, W., Julia, S., Afenjar, A., Gautier, A., Rivier, F., Meyer, S., Berquin, P., Helias, M., Py, I., Rivera,  
37 S., Bahi-Buisson, N., Gourfinkel-An, I., Cazeneuve, C., Ruberg, M., Brice, A., Nabbout, R., and Leguern, E.  
38 (2009). Sporadic infantile epileptic encephalopathy caused by mutations in PCDH19 resembles Dravet  
39 syndrome but mainly affects females. *PLoS Genet* 5, e1000381. [10.1371/journal.pgen.1000381](https://doi.org/10.1371/journal.pgen.1000381)
- 40 Depienne, C., and LeGuern, E. (2012). PCDH19-related infantile epileptic encephalopathy: an unusual X-  
41 linked inheritance disorder. *Human mutation* 33, 627-634. [10.1002/humu.22029](https://doi.org/10.1002/humu.22029)
- 42 Dibbens, L.M., Tarpey, P.S., Hynes, K., Bayly, M.A., Scheffer, I.E., Smith, R., Bomar, J., Sutton, E., Vandeleur,  
43 L., Shoubridge, C., Edkins, S., Turner, S.J., Stevens, C., O'Meara, S., Tofts, C., Barthorpe, S., Buck, G., Cole,  
44 J., Halliday, K., Jones, D., Lee, R., Madison, M., Mironenko, T., Varian, J., West, S., *et al.* (2008). X-linked

1 protocadherin 19 mutations cause female-limited epilepsy and cognitive impairment. *Nat Genet* *40*, 776-  
2 781. 10.1038/ng.149  
3 Dimova, P.S., Kirov, A., Todorova, A., Todorov, T., and Mitev, V. (2012). A novel PCDH19 mutation inherited  
4 from an unaffected mother. *Pediatric neurology* *46*, 397-400. 10.1016/j.pediatrneurol.2012.03.004  
5 Duszyc, K., Terczynska, I., and Hoffman-Zacharska, D. (2015). Epilepsy and mental retardation restricted  
6 to females: X-linked epileptic infantile encephalopathy of unusual inheritance. *J Appl Genet* *56*, 49-56.  
7 10.1007/s13353-014-0243-8  
8 Eimon, P.M., Ghannad-Rezaie, M., De Rienzo, G., Allalou, A., Wu, Y., Gao, M., Roy, A., Skolnick, J., and  
9 Yanik, M.F. (2018). Brain activity patterns in high-throughput electrophysiology screen predict both drug  
10 efficacies and side effects. *Nat Commun* *9*, 219. 10.1038/s41467-017-02404-4  
11 Epi4K Consortium, and Epilepsy Phenome/Genome Project (2017). Ultra-rare genetic variation in common  
12 epilepsies: a case-control sequencing study. *Lancet Neurol* *16*, 135-143. 10.1016/S1474-4422(16)30359-3  
13 Griffin, A., Carpenter, C., Liu, J., Paterno, R., Grone, B., Hamling, K., Moog, M., Dinday, M.T., Figueroa, F.,  
14 Anvar, M., Ononuju, C., Qu, T., and Baraban, S.C. (2021). Phenotypic analysis of catastrophic childhood  
15 epilepsy genes. *Commun Biol* *4*, 680. 10.1038/s42003-021-02221-y  
16 Griffin, A., Hamling, K.R., Knupp, K., Hong, S., Lee, L.P., and Baraban, S.C. (2017). Clemizole and modulators  
17 of serotonin signalling suppress seizures in Dravet syndrome. *Brain* *140*, 669-683. 10.1093/brain/aww342  
18 Grone, B.P., Marchese, M., Hamling, K.R., Kumar, M.G., Krasniak, C.S., Sicca, F., Santorelli, F.M., Patel, M.,  
19 and Baraban, S.C. (2016). Epilepsy, Behavioral Abnormalities, and Physiological Comorbidities in Syntaxin-  
20 Binding Protein 1 (STXBP1) Mutant Zebrafish. *PLoS One* *11*, e0151148. 10.1371/journal.pone.0151148  
21 Hayashi, S., Inoue, Y., Hattori, S., Kaneko, M., Shioi, G., Miyakawa, T., and Takeichi, M. (2017). Loss of X-  
22 linked Protocadherin-19 differentially affects the behavior of heterozygous female and hemizygous male  
23 mice. *Sci Rep* *7*, 5801. 10.1038/s41598-017-06374-x  
24 Hoffman, E.J., Turner, K.J., Fernandez, J.M., Cifuentes, D., Ghosh, M., Ijaz, S., Jain, R.A., Kubo, F., Bill, B.R.,  
25 Baier, H., Granato, M., Barresi, M.J., Wilson, S.W., Rihel, J., State, M.W., and Giraldez, A.J. (2016).  
26 Estrogens Suppress a Behavioral Phenotype in Zebrafish Mutants of the Autism Risk Gene, CNTNAP2.  
27 *Neuron* *89*, 725-733. 10.1016/j.neuron.2015.12.039  
28 Homan, C.C., Pederson, S., To, T.H., Tan, C., Piltz, S., Corbett, M.A., Wolvetang, E., Thomas, P.Q., Jolly, L.A.,  
29 and Gecz, J. (2018). PCDH19 regulation of neural progenitor cell differentiation suggests asynchrony of  
30 neurogenesis as a mechanism contributing to PCDH19 Girls Clustering Epilepsy. *Neurobiol Dis* *116*, 106-  
31 119. 10.1016/j.nbd.2018.05.004  
32 Hortopan, G.A., Dinday, M.T., and Baraban, S.C. (2010). Spontaneous seizures and altered gene expression  
33 in GABA signaling pathways in a mind bomb mutant zebrafish. *J Neurosci* *30*, 13718-13728.  
34 10.1523/JNEUROSCI.1887-10.2010  
35 Hoshina, N., Johnson-Venkatesh, E.M., Hoshina, M., and Umemori, H. (2021). Female-specific synaptic  
36 dysfunction and cognitive impairment in a mouse model of PCDH19 disorder. *Science* *372*.  
37 10.1126/science.aaz3893  
38 Hunt, R.F., Hortopan, G.A., Gillespie, A., and Baraban, S.C. (2012). A novel zebrafish model of  
39 hyperthermia-induced seizures reveals a role for TRPV4 channels and NMDA-type glutamate receptors.  
40 *Exp Neurol* *237*, 199-206. 10.1016/j.expneurol.2012.06.013  
41 Kimmel, C.B., Ballard, W.W., Kimmel, S.R., Ullmann, B., and Schilling, T.F. (1995). Stages of embryonic  
42 development of the zebrafish. *Dev Dyn* *203*, 253-310. 10.1002/aja.1002030302  
43 Kolc, K.L., Sadleir, L.G., Scheffer, I.E., Ivancevic, A., Roberts, R., Pham, D.H., and Gecz, J. (2018). A  
44 systematic review and meta-analysis of 271 PCDH19-variant individuals identifies psychiatric  
45 comorbidities, and association of seizure onset and disease severity. *Mol Psychiatry*. 10.1038/s41380-018-  
46 0066-9  
47 Kysil, E.V., Meshalkina, D.A., Frick, E.E., Echevarria, D.J., Rosemberg, D.B., Maximino, C., Lima, M.G., Abreu,  
48 M.S., Giacomini, A.C., Barcellos, L.J.G., Song, C., and Kalueff, A.V. (2017). Comparative Analyses of

- 1 Zebrafish Anxiety-Like Behavior Using Conflict-Based Novelty Tests. *Zebrafish* 14, 197-208.  
2 10.1089/zeb.2016.1415
- 3 Lin, X., Duan, X., Jacobs, C., Ullmann, J., Chan, C.Y., Chen, S., Cheng, S.H., Zhao, W.N., Poduri, A., Wang, X.,  
4 Haggarty, S.J., and Shi, P. (2018). High-throughput brain activity mapping and machine learning as a  
5 foundation for systems neuropharmacology. *Nat Commun* 9, 5142. 10.1038/s41467-018-07289-5
- 6 Liu, J., and Baraban, S.C. (2019). Network Properties Revealed during Multi-Scale Calcium Imaging of  
7 Seizure Activity in Zebrafish. *eNeuro* 6. 10.1523/ENEURO.0041-19.2019
- 8 Meeker, N.D., Hutchinson, S.A., Ho, L., and Trede, N.S. (2007). Method for isolation of PCR-ready genomic  
9 DNA from zebrafish tissues. *Biotechniques* 43, 610, 612, 614. 10.2144/000112619
- 10 Mincheva-Tasheva, S., Nieto Guil, A.F., Homan, C.C., Gecz, J., and Thomas, P.Q. (2021). Disrupted  
11 Excitatory Synaptic Contacts and Altered Neuronal Network Activity Underpins the Neurological  
12 Phenotype in PCDH19-Clustering Epilepsy (PCDH19-CE). *Mol Neurobiol* 58, 2005-2018. 10.1007/s12035-  
13 020-02242-4
- 14 Pederick, D.T., Homan, C.C., Jaehne, E.J., Piltz, S.G., Haines, B.P., Baune, B.T., Jolly, L.A., Hughes, J.N., Gecz,  
15 J., and Thomas, P.Q. (2016). *Pcdh19* Loss-of-Function Increases Neuronal Migration In Vitro but is  
16 Dispensable for Brain Development in Mice. *Sci Rep* 6, 26765. 10.1038/srep26765
- 17 Pederick, D.T., Richards, K.L., Piltz, S.G., Kumar, R., Mincheva-Tasheva, S., Mandelstam, S.A., Dale, R.C.,  
18 Scheffer, I.E., Gecz, J., Petrou, S., Hughes, J.N., and Thomas, P.Q. (2018). Abnormal Cell Sorting Underlies  
19 the Unique X-Linked Inheritance of PCDH19 Epilepsy. *Neuron* 97, 59-66 e55.  
20 10.1016/j.neuron.2017.12.005
- 21 Rakotomamonjy, J., Sabetfakhri, N.P., McDermott, S.L., and Guemez-Gamboa, A. (2020). Characterization  
22 of seizure susceptibility in *Pcdh19* mice. *Epilepsia* 61, 2313-2320. 10.1111/epi.16675
- 23 Samanta, D. (2020). PCDH19-Related Epilepsy Syndrome: A Comprehensive Clinical Review. *Pediatr*  
24 *Neurol* 105, 3-9. 10.1016/j.pediatrneurol.2019.10.009
- 25 Schnorr, S.J., Steenbergen, P.J., Richardson, M.K., and Champagne, D.L. (2012). Measuring thigmotaxis in  
26 larval zebrafish. *Behav Brain Res* 228, 367-374. 10.1016/j.bbr.2011.12.016
- 27 Smith, L., Singhal, N., El Achkar, C.M., Truglio, G., Rosen Sheidley, B., Sullivan, J., and Poduri, A. (2018).  
28 PCDH19-related epilepsy is associated with a broad neurodevelopmental spectrum. *Epilepsia*.  
29 10.1111/epi.14003
- 30 Tan, C., Shard, C., Ranieri, E., Hynes, K., Pham, D.H., Leach, D., Buchanan, G., Corbett, M., Shoubridge, C.,  
31 Kumar, R., Douglas, E., Nguyen, L.S., McMahon, J., Sadleir, L., Specchio, N., Marini, C., Guerrini, R., Moller,  
32 R.S., Depienne, C., Haan, E., Thomas, P.Q., Berkovic, S.F., Scheffer, I.E., and Gecz, J. (2015). Mutations of  
33 protocadherin 19 in female epilepsy (PCDH19-FE) lead to allopregnanolone deficiency. *Hum Mol Genet*  
34 24, 5250-5259. 10.1093/hmg/ddv245
- 35 Thyme, S.B., Pieper, L.M., Li, E.H., Pandey, S., Wang, Y., Morris, N.S., Sha, C., Choi, J.W., Herrera, K.J., Soucy,  
36 E.R., Zimmerman, S., Randlett, O., Greenwood, J., McCarroll, S.A., and Schier, A.F. (2019). Phenotypic  
37 Landscape of Schizophrenia-Associated Genes Defines Candidates and Their Shared Functions. *Cell* 177,  
38 478-491 e420. 10.1016/j.cell.2019.01.048
- 39 Turrini, L., Fornetto, C., Marchetto, G., Mullenbroich, M.C., Tiso, N., Vettori, A., Resta, F., Masi, A.,  
40 Mannaioni, G., Pavone, F.S., and Vanzi, F. (2017). Optical mapping of neuronal activity during seizures in  
41 zebrafish. *Sci Rep* 7, 3025. 10.1038/s41598-017-03087-z
- 42 Wang, W., and Frankel, W.N. (2021). Overlaps, gaps, and complexities of mouse models of Developmental  
43 and Epileptic Encephalopathy. *Neurobiol Dis* 148, 105220. 10.1016/j.nbd.2020.105220
- 44 Wu, Q. (2005). Comparative genomics and diversifying selection of the clustered vertebrate protocadherin  
45 genes. *Genetics* 169, 2179-2188. 10.1534/genetics.104.037606

46

47



## 1 Supplemental information

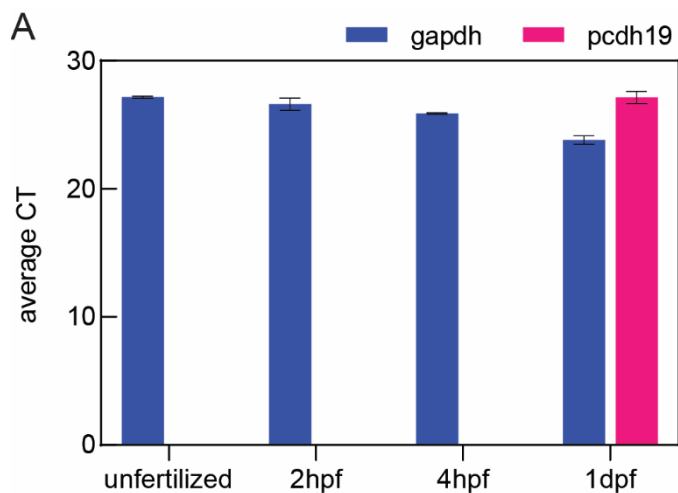

3 **Supplemental Figure 1:** (A) No maternal *pcdh19* mRNA detectable in unfertilized eggs or young embryos. qPCR of  
 4 WT embryos shows undetectable *pcdh19* mRNA expression at unfertilized, 2hpf, and 4hpf, despite detectable *gapdh*  
 5 expression. Both *pcdh19* and *gapdh* expression are present at 1dpf. qPCR protocol 40 cycles. N=3 samples of 20 pooled  
 6 eggs or embryos for each timepoint.

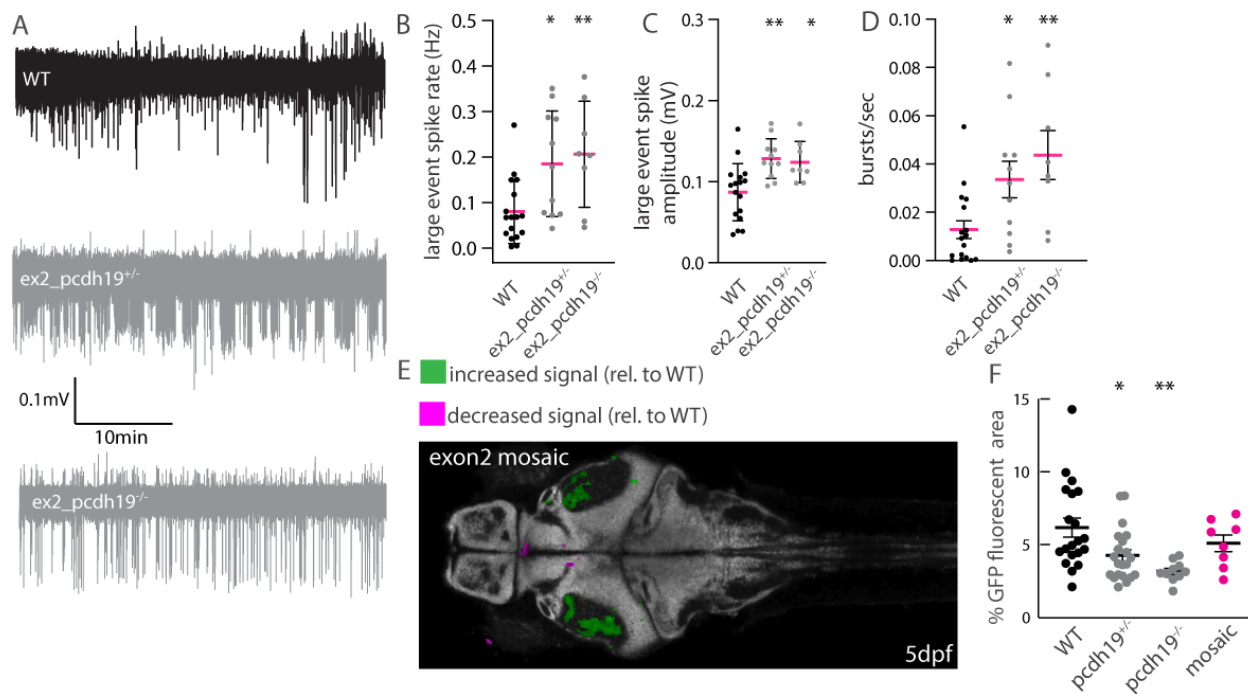

8

9 **Supplemental Figure 2:** (A) Representative traces of LFP recordings for WT, exon2-*pcdh19*<sup>+/-</sup>, and exon2-*pcdh19*<sup>-/-</sup>  
 10 *- exon2* larvae showing beta events consisting of bursts of spikes present in *pcdh19* mutants and to a lesser extent  
 11 in controls. (B) Quantification shows a significant increase in beta event rate, (C) in the average beta spike amplitude, and  
 12 (D) in the average beta burst rate in both exon2 *pcdh19* mutants compared to the WT. n=16 WT, n=11 ex2\_ *pcdh19*<sup>+/-</sup>,  
 13 n=8 ex2\_ *pcdh19*<sup>-/-</sup>. One-way ANOVA with Dunnett's multiple comparisons test, \*p<0.05, \*\*p<0.01. (E) Confocal image  
 14 shows pERK signal intensity is increased within the neuropil of the optic tectum relative to the control. n=23 exon2  
 15 mosaic, n=28 scrambled injected larvae. (F) Quantification of the percentage of GFP-positive pixels shows a significant

1 decrease in *pcdh19*<sup>+/-</sup> and *pcdh19*<sup>-/-</sup> larvae compared to WT and mosaic larvae. n=20 WT, n=21 *pcdh19*<sup>+/-</sup>, n=10  
2 *pcdh19*<sup>-/-</sup>, n=8 mosaic. One-way ANOVA with Dunnett's multiple comparisons test, \*p<0.05, \*\*p<0.01.

3

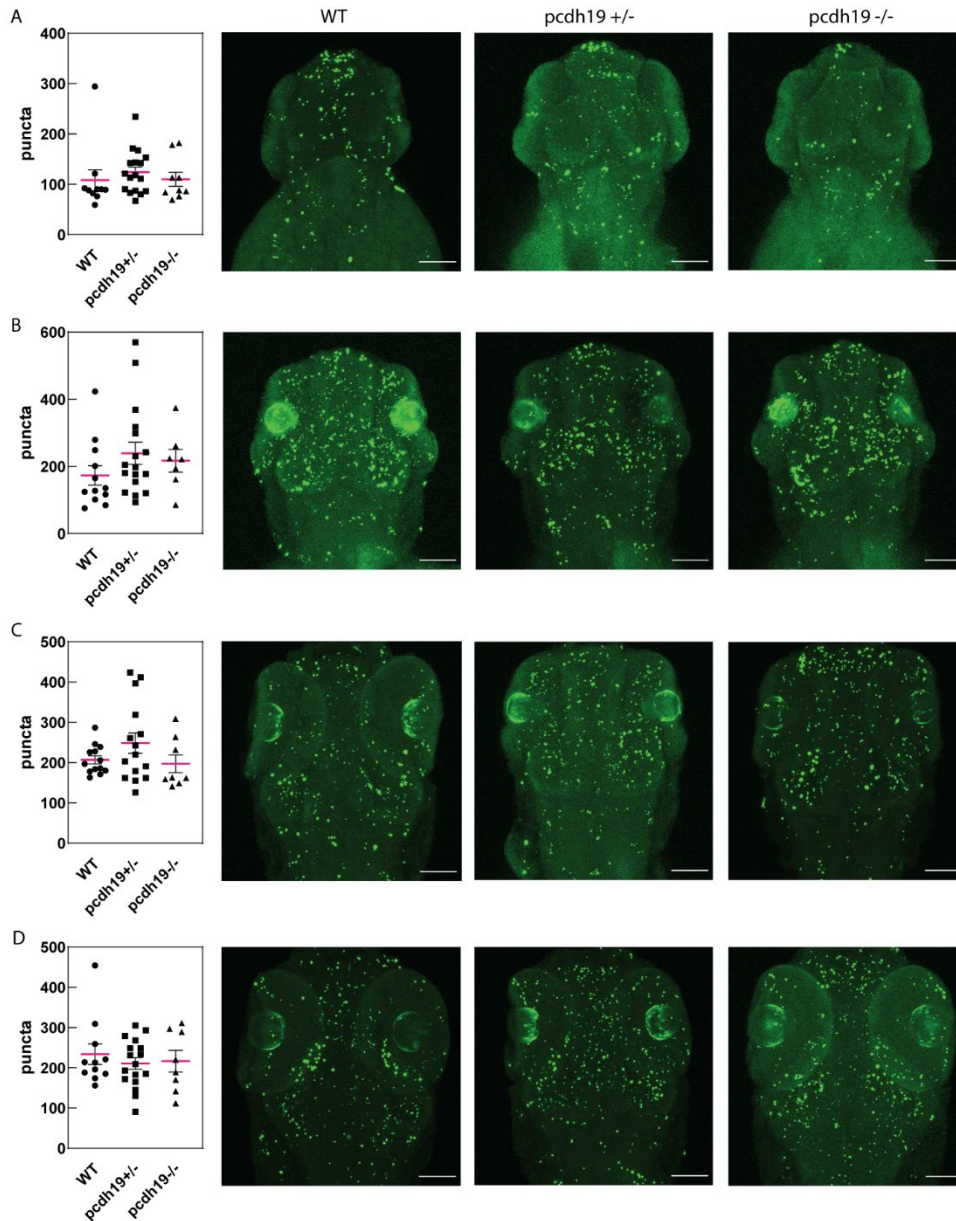

4

5 **Supplemental Figure 3:** Quantification of TUNEL positive punctae shows no difference in WT compared to *pcdh19*  
6 KO mutants at (A) 2dpf, (B) 3dpf, (C) 4dpf, and (D) 5dpf. Representative confocal maximum intensity projections of a  
7 Z-stack are shown on the right, next to the quantification for each developmental time point and mutant. Scale bar  
8 100µm. 2dpf: 2dpf n=10 WT, n=17 *pcdh19*<sup>+/-</sup>, and n=9 *pcdh19*<sup>-/-</sup> larvae, 3dpf n=12 WT, n=17 *pcdh19*<sup>+/-</sup>, and n=7 *pcdh19*<sup>-/-</sup>  
9 *pcdh19*<sup>-/-</sup> larvae, 4dpf: n=13 WT, n=15 *pcdh19*<sup>+/-</sup>, and n=8 *pcdh19*<sup>-/-</sup> larvae, 5dpf n=11 WT, n=17 *pcdh19*<sup>+/-</sup>, and n=8 *pcdh19*<sup>-/-</sup>  
10 larvae. One-way ANOVA with Tukey's multiple comparisons test.

11 **Supplemental video 1:** Light sheet calcium imaging video of a 7dpf *pcdh19*<sup>+/-</sup> larvae with  
12 spontaneous calcium activity

- 1 **Supplemental video 2 & 3:** FDSS low-resolution calcium imaging video clip of a heterozygous
- 2 pcdh19 mutant having a seizure and a calcium event.
- 3
