# Supplementary material for: Mosaic and non-mosaic protocadherin 19 mutation leads to neuronal hyperexcitability in zebrafish
Source: bioRxiv or medRxiv preprint supplement (doi:10.1101/2021.09.03.458732), 2022-04-13
Supplement: Supplementary file [file media-1.pdf]

## Supplemental information

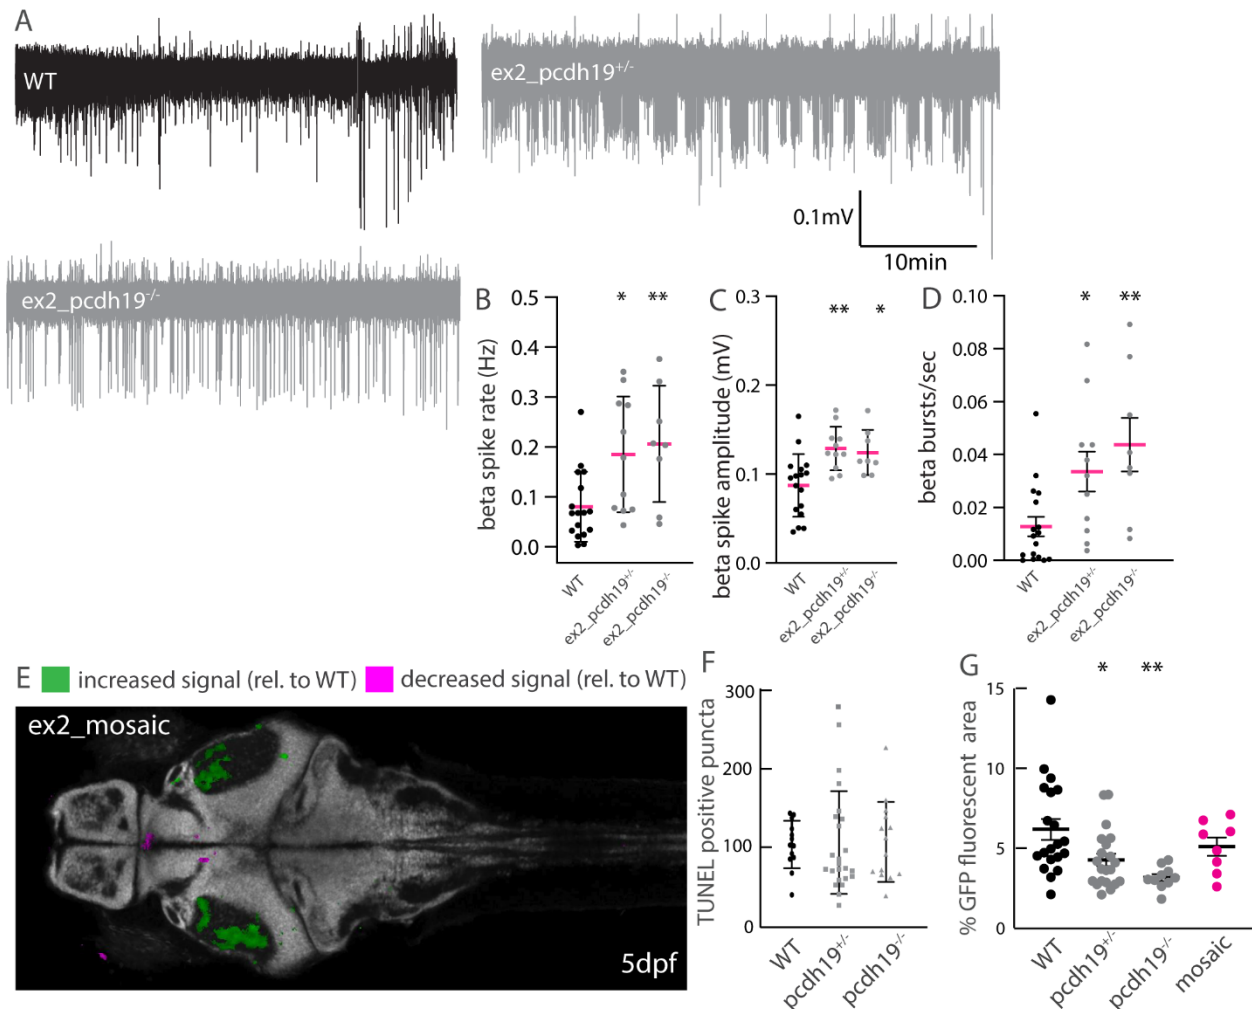

**Supplemental Figure 1:** (A) Representative traces of LFP recordings for WT, exon2-*pcdh19*<sup>+/−</sup>, and exon2-*pcdh19*<sup>−/−</sup> larvae showing beta events consisting of bursts of spikes present in *pcdh19* mutants and, to a lesser extent, in controls. (B) Quantification shows a significant increase in beta event rate, (C) in the average beta spike amplitude, and (D) in the average beta burst rate in both exon2 *pcdh19* mutants compared to the WT. n=16 WT, n=11 *ex2\_pcdh19*<sup>+/−</sup>, n=8 *ex2\_pcdh19*<sup>−/−</sup>. One-way ANOVA with Dunnett's multiple comparisons test, \*p < 0.05, \*\*p < 0.01. (E) Confocal image shows pERK signal intensity is increased within the neuropil of the optic tectum relative to the control. n=23 exon2 mosaic, n=28 scrambled injected larvae. (F) Quantification of TUNEL positive puncta shows no difference in WT compared to *pcdh19* KO mutants. n=13 WT, n=33 *pcdh19*<sup>+/−</sup>, n=14 *pcdh19*<sup>−/−</sup>. One-way ANOVA with Tukey's multiple comparisons test. (G) Quantification of the percentage of GFP-positive pixels shows a significant decrease in *pcdh19*<sup>+/−</sup> and *pcdh19*<sup>−/−</sup> larvae compared to WT and mosaic larvae. n=20 WT, n=21 *pcdh19*<sup>+/−</sup>, n=10 *pcdh19*<sup>−/−</sup>, n=8 mosaic. One-way ANOVA with Dunnett's multiple comparisons test, \*p < 0.05, \*\*p < 0.01.

**Supplemental video 1:** Light sheet calcium imaging video of a 7dpf *pcdh19*<sup>+/−</sup> larvae with spontaneous calcium activity

**Supplemental video 2 & 3:** FDSS low-resolution calcium imaging video clip of a heterozygous *pcdh19* mutant having a seizure and a calcium event.
